1 **Stromal cells regulate malignant B-cell spatial organization, survival, and drug**  
2 **response in a new 3D model mimicking lymphoma tumor niche**

3

4 Claire Lamaison<sup>1</sup>¥, Simon Latour<sup>2,3</sup>¥□, Nelson Hélaine<sup>4</sup>¥, Valérie Le Morvan<sup>2,3</sup>, Céline  
5 Monvoisin<sup>1</sup>, Isabelle Mahouche<sup>2,3</sup>, Christelle Dussert<sup>2,3</sup>, Elise Dessauge<sup>1</sup>, Céline  
6 Pangault<sup>1,5</sup>, Marine Seffals<sup>6</sup>, Léa Broca-Brisson<sup>2,3</sup>□, Kévin Alessandri<sup>4</sup>□, Pierre  
7 Soubeyran<sup>2,3</sup>, Frédéric Mourcin<sup>1</sup>, Pierre Nassoy<sup>4</sup>, Gaëlle Recher<sup>4,\*\*</sup>, Karin Tarte<sup>1,5,\*\*</sup>  
8 and Laurence Bresson-Bepoldin<sup>2,3,\*\*</sup>□

9

10 ¥: co-first authors

11 \*\*: co-corresponding authors

12 <sup>1</sup>UMR S 1236, Univ Rennes, INSERM, Etablissement Français du sang, F-35000,  
13 Rennes, France.

14 <sup>2</sup>Univ. Bordeaux, INSERM, U1218 ACTION F-33076 Bordeaux, France

15 <sup>3</sup>Institut Bergonié, Comprehensive Cancer Centre, Bordeaux, France

16 <sup>4</sup>Univ. Bordeaux, CNRS, UMR 5298 LP2N, Laboratoire Photonique Numérique et  
17 Nanosciences, Institut d'Optique Graduate School, F-33400 Talence, France

18 <sup>5</sup>SITI, Pôle de Biologie, CHU Pontchaillou, F-35000, Rennes, France

19 <sup>6</sup>Univ Rennes1, Inserm, CNRS, UMS Biosit, Core Facility H2P2 Rennes, France

20

21 \*\*: Corresponding authors:

22 [laurence.bresson-bepoldin@inserm.fr](mailto:laurence.bresson-bepoldin@inserm.fr)

23 [karin.tarte@univ-rennes1.fr](mailto:karin.tarte@univ-rennes1.fr)

24 [gaelle.recher@institutoptique.fr](mailto:gaelle.recher@institutoptique.fr)

25 □ Present addresses:

26 S Latour: University of Toronto, Institute of Biomedical Engineering, Toronto, Canada

27

28 L Broca-Brisson: University Paris-Saclay, CEA, Département Médicaments et

29 Technologies pour la Santé (DMTS), Service de Pharmacologie et Immunoanalyse

30 (SPI), F-91191, Gif-sur-Yvette, France.

31 K Alessandri: TreeFrog Therapeutics, 33600 Pessac, France

32

33 L Bresson-Bepoldin: University of Bordeaux, CNRS, INSERM, Bariton, U1053, F-

34 33000, Bordeaux, France.

35 ABSTRACT

36

37 Non-Hodgkin B-cell lymphomas (B-NHL) mainly develop within lymph nodes  
38 as densely packed aggregates of tumor cells and their surrounding  
39 microenvironment, creating a tumor niche specific to each lymphoma subtypes. Until  
40 now, *in vitro* preclinical models mimicking biomechanical forces, cellular  
41 microenvironment, and 3D organization of B lymphomas remain scarce while all  
42 these parameters constitute key determinants of lymphomagenesis and drug  
43 resistance. Using a microfluidic method based on the encapsulation of cells inside  
44 permeable, elastic, and hollow alginate microspheres, we developed a new tunable  
45 3D-model incorporating extracellular matrix and/or stromal cells. Lymphoma B cells  
46 and stromal cells dynamically formed self-organized 3D spheroids, thus initiating a  
47 coevolution of these two cell types, reflecting their bidirectional crosstalk, and  
48 recapitulating the heterogeneity of B-NHL subtypes. In addition, this approach makes  
49 it suitable to assess in a relevant *in vitro* model the activity of new therapeutic agents  
50 in B-NHL.

51

52

## 53 INTRODUCTION

54

55 Non-Hodgkin lymphoma (NHL) is a group of common hematological  
56 malignancies, with the majority of them originating from B cells. Follicular lymphoma  
57 (FL) and diffuse large B-cell lymphomas (DLBCL), the two most frequent B-cell NHL  
58 (B-NHL) (Smith et al., 2011; Teras et al., 2016), result from the malignant  
59 transformation of germinal center (GC) or post-GC B cells. FL are indolent  
60 lymphomas characterized by the occurrence of the t(14;18)(q32;q21) translocation  
61 combined with additional recurrent somatic alterations (Huet et al., 2018). Two major  
62 subtypes of aggressive DLBCL, GC B-cell (GCB) and activated B-cell (ABC)-DLBCL,  
63 have been identified using gene expression profiling, reflecting their putative cell of  
64 origin and molecular alterations (Alizadeh et al., 2000). Despite a better  
65 understanding of the pathophysiology of these tumors, frontline therapy remains  
66 based on a combination of conventional chemotherapies such as CHOP  
67 (Cyclophosphamide, Hydroxydaunorubicin, Vincristine and Prednisone) and a  
68 monoclonal antibody against CD20. Nonetheless, 30–40% of DLBCL patients  
69 develop relapse or have refractory disease that cannot be cured with the standard  
70 immunochemotherapy (Sehn and Gascoyne, 2015). In addition, FL remains  
71 essentially an incurable disease and about 20% of patients progress or relapse in the  
72 first 2 years following treatment initiation, with a dismal prognosis (Huet et al., 2018).

73 It is now widely accepted that tumors constitute a complex ecosystem  
74 composed of many cell types regulated by biological, structural, chemical, and  
75 mechanical cues, that altogether participate in the effectiveness of therapeutic  
76 molecules (Bissell and Radisky, 2001). The tumor microenvironment of B-cell  
77 lymphomas contains highly variable numbers of immune cells, stromal cells, blood

78 vessels, and extracellular matrix (ECM) and the interplay between these elements  
79 produces a tumor niche specific to each lymphoma subtypes (Scott and Gascoyne,  
80 2014; Verdière et al., 2018). FL exhibits a high dependence on a GC-like  
81 microenvironment where immune and stromal cells support survival, proliferation,  
82 and migration of malignant B cells. In turn, FL cells modulate the phenotype and  
83 function of their surrounding microenvironment. In particular, FL-infiltrating stromal  
84 cells are engaged in a bidirectional crosstalk with malignant B cells within infiltrated  
85 lymph nodes and bone marrow (Guilloton et al., 2012; Pandey et al., 2017).  
86 Conversely DLBCL have been proposed as less dependent on lymph node  
87 microenvironment but specific stromal signatures have been shown to impact DLBCL  
88 prognosis (Fowler et al., 2016; Scott and Gascoyne, 2014). Importantly, studies  
89 exploring functional interactions between lymphoma B cells and stromal cells have  
90 been essentially performed in 2D *in vitro* culture models whereas biomechanical  
91 forces and 3D organization emerged as key determinants of lymphoma pathogenesis  
92 and drug resistance.

93 *In vitro*, 2D culture of cell lines is the model mainly used to screen new  
94 molecules. However, this constitutes an “ideal” model where nutrients, oxygen, and  
95 drugs reach freely all cells. In addition, these cell cultures do not consider the spatial  
96 architecture of tissues, and lack microenvironment and ECM identified as tumor  
97 safety guards from chemotherapies. In this context, multicellular spheroids or tumor  
98 organoids represent promising models allowing high-throughput screening of anti-  
99 cancer drugs in versatile systems mixing several cell types and ECM components.  
100 While 3D culture models are increasingly developed for solid cancer (Clevers, 2016),  
101 their transfer to lymphoma modeling is still limited and includes: i) multicellular  
102 aggregates of lymphoma cells obtained using hanging drop method, which are useful

103 for testing drug efficacy but do not account for the effect of cell-cell and cell-ECM  
104 interactions (Decaup et al., 2019; Gravelle et al., 2014), ii) 3D lymphoma organoid  
105 models integrating lymphoid-like stromal cells or integrin-specific binding peptides to  
106 recapitulate more accurately lymphoma microenvironment, but difficult to handle and  
107 low throughput (Tian et al., 2015).

108 In the present study, we aimed at providing a 3D lymphoma model that both  
109 integrates interactions between stromal cells and lymphoma B cells and is amenable  
110 to high throughput screening. Using a microfluidic method based on the  
111 encapsulation of cells inside permeable, elastic, and hollow alginate microspheres  
112 (Alessandri et al., 2013), we developed a new tunable 3D model incorporating ECM  
113 and/or stromal cells. We showed that lymphoma B cells and stromal cells form 3D  
114 spheroids whose internal architecture is driven by self-organization, thus initiating a  
115 bidirectional crosstalk and a co-evolution of these two cell types, recapitulating the  
116 heterogeneity of B-NHL subtype. In addition, this approach makes it possible to  
117 assess drug efficacy in a relevant *in vitro* B-NHL model.

## 118 RESULTS

### 119 **1) *B-NHL cell lines form cohesive spheroids in scaffold-free alginate*** 120 ***capsules***

121 To produce spheroids from lymphoma B-cell lines, we used the cellular capsule  
122 technology, initially developed to generate spheroids from solid cancer tumor cells  
123 (Alessandri et al., 2013, 2016). Three B-NHL cell lines have been selected for  
124 encapsulation as representative models for GCB-DLBCL (SU-DHL-4), ABC-DLBCL  
125 (HLY1) and FL (DOHH2). From image-based analysis (N=656), the mean of the  
126 capsule diameter distribution was  $215.9 \pm 1.3 \mu\text{m}$  and the capsules contained an  
127 average of  $18.2 \pm 0.8$  cells/ capsule (N=48) (Figure S1). During the first 11 days, SU-  
128 DHL-4 and HLY1 proliferated and aggregated to form spheroids. Alike the  
129 terminology used for 2D cultures, we called '3D confluence', the stage when cells  
130 filled up the capsule and reached the internal wall of the alginate shell. Contrastingly,  
131 DOHH2 cells were not able to grow and form spheroids even after 17 days (Figure  
132 1A) suggesting their requirement of a supportive microenvironment. Cell survival in  
133 SU-DHL-4 and HLY1 spheroids was evaluated at various culture time points using  
134 propidium iodide labelling. Upon spheroid dissociation and flow cytometry  
135 quantification, we found that the percentage of dead cells remained as low as 20-  
136 30% during the first week in culture and then increased to about 60% after 8 to 12  
137 days (Figure 1B). As a corollary, EdU staining revealed that the early stages of  
138 spheroid growth were characterized by a high proliferation rate while post-confluent  
139 stages exhibited a significant decrease in cell proliferation concomitant with cell death  
140 increase (Figure S2). To determine whether this survival decrease was associated  
141 with the formation and growth of a dead cellular core, as observed in solid tumor  
142 spheroids (Däster et al., 2016; Sutherland, 1988), we performed immunostaining for

143 cell proliferation (Ki67) and cell death (cleaved caspase 3). Besides an increased cell  
144 death after confluence (Figure 1B and Figure S2), neither Ki67 nor cleaved-caspase-  
145 3 regionalization was detected at prior or after 3D confluence (Figure 1C).

146 To check that the capsule content was not only a confined cell suspension but  
147 formed truly cohesive spheroids, the alginate shell was dissolved in PBS containing 1  
148 mM EGTA. As shown in figure 2A (and movie 1), the integrity of the cellular  
149 aggregates observed after confluence was maintained upon capsule dissolution,  
150 suggesting that 3D culture may induce the secretion of cohesive ECM. We thus  
151 compared by immunofluorescence the expression of laminin, fibronectin, and  
152 collagen I, three ECM components expressed in secondary lymphoid organs (Chen  
153 et al., 2012; Sobocinski et al., 2010), between cells cultured in suspension (2D) or in  
154 capsules (3D). SU-DHL-4 already expressed collagen 1 in 2D culture and  
155 upregulated laminin and fibronectin in 3D spheroids. Conversely, HLY1 displayed  
156 similar laminin expression in 2D and 3D cultures but increased fibronectin and  
157 collagen 1 in 3D spheroids (Figure 2B). Altogether these data argue for a promotion  
158 of ECM expression in 3D cultures of lymphoma cells.

159 Altogether, these data show that the cellular capsule technology is a valuable  
160 approach to produce cohesive lymphoma spheroids from DLBCL.

161

## 162 **2) Tumor B-cell and stromal cell co-encapsulation and 3D self-organization** 163 ***promote spheroid growth***

164 Since B-NHL are organized as mixed aggregates of tumor cells and  
165 lymphoma-supportive non-malignant components (Verdière et al., 2018), we decided  
166 to aim for a more physiopathological model by introducing lymphoid stromal cells  
167 isolated from human tonsils (Tonsil Stromal Cells, TSC) (Ame-Thomas et al., 2007)



168 and ECM components (Matrigel). We observed that lymphoma cell growth, evaluated  
169 by cell counting, was differentially regulated by the presence of ECM and stromal  
170 cells. Indeed, while the presence of stromal cells had no significant effect on HLY1  
171 spheroid growth, they significantly increased the growth kinetic of SU-DHL-4  
172 spheroids, and they even promoted DOHH2-derived spheroid formation and growth,  
173 which were not achieved in the absence of TSC (Figure 3A). These results suggest  
174 that our 3D model recapitulates the high TSC-dependence of FL B cells whereas  
175 DLBCL exhibit a more variable dependence (Ciavarella et al., 2018).

176 We next sought to decipher how stromal cells play a supportive role on DOHH2  
177 spheroid formation. DOHH2 cells were co-encapsulated with TSC in the presence or  
178 absence of a layer of Matrigel anchored to the inner wall of the capsules (Alessandri  
179 et al., 2016). In the absence of Matrigel, the capsule wall remained cell-repellent and  
180 stromal cells formed clusters inside the capsules but were unable to induce DOHH2  
181 spheroid growth (Figure 3B and C). In contrast, in the presence of Matrigel, TSC  
182 spread onto ECM, leading to the formation of a ramified 3D network of stromal cells,  
183 that subsequently supported B cell proliferation (Figure 3D and movies 2-3).

184 We then monitored the stromal cell network dynamic by imaging capsules after 2,  
185 24, 48, 72, and 96h of culture using confocal microscopy (Figure 4A). By solely  
186 focusing on stromal cells, we performed 3D+time image analysis and measured  
187 sphericity and branchness that both characterized the evolution of the stromal cell  
188 network complexity. High sphericity index indicated a compact morphology of the  
189 stromal network, thus offering a limited surface of interaction with B cells. Conversely,  
190 high branchness index was associated to a ramified network that increased the  
191 probability of B cell-stromal cell physical contacts. Stromal cell morphology was  
192 significantly modified as early as 24h after encapsulation, as revealed by the

193 opposite variations of the sphericity and branchness indexes (Figure 4B and C). In  
194 addition, after a rapid initial change, both parameters underwent a slower but  
195 continuous evolution in time in the same correlated manner, indicating that the  
196 increased branching architecture of the stromal network was not a disorganized and  
197 randomly observed feature but was sustained by a self-organization process (Figure  
198 4D).

199

### 200 3) ***Microencapsulated 3D co-cultures recapitulate phenotypic features of B*** 201 ***lymphomas***

202 We decided to focus on the 3D TSC-DOHH2 co-culture to investigate the  
203 stromal/B-cell bidirectional crosstalk. Previously, we have demonstrated that FL B  
204 cells could contribute to the commitment of mesenchymal precursors into lymphoid-  
205 like differentiation (at least partly through the secretion of TNF $\alpha$  (TNF)) (Ame-  
206 Thomas et al., 2007; Guilloton et al., 2012). Interestingly, we revealed that 3D cell co-  
207 cultures induced a stromal cell phenotype similar to that observed *in situ* in FL lymph  
208 nodes (Figure 5). More specifically DOHH2 induced podoplanin (PDPN) expression  
209 in stromal cells while this was not the case in 2D co-cultures in which only the  
210 treatment of TSC cells with a combination of TNF and lymphotoxin  $\alpha 1\beta 2$  (LT), the  
211 two factors involved in lymphoid stroma differentiation, was able to trigger stromal  
212 PDPN expression (Figure 5 and Figure S3). Within spheroids, stromal cells thus  
213 acquired characteristics mimicking those observed *in situ*, suggesting that 3D spatial  
214 organization is an added value to recapitulate the pathophysiology of lymphoma  
215 tissues.

216 We next studied the gene expression profile (GEP) of DOHH2 cells cultured for  
217 10 days either in monoculture in 2D (noted 2D), or in co-culture with TSC in 2D or 3D

218 (respectively noted 2D + TSC and 3D + TSC). Data were then compared with the  
219 GEP of purified FL B cells and normal tonsil centrocytes (CC) obtained by Affymetrix  
220 microarrays. Expression of 37 genes involved in several transduction pathways  
221 including NF- $\kappa$ B cascade, migration signaling, cell cycle/quiescence, and apoptosis,  
222 was studied by RT-qPCR (Table 1, Figure S4). Analyses revealed a shift in GEP of B  
223 cells cultured in 3D compared to cells cultured in 2D with or without TSC (Figure 6 A).  
224 In particular, we observed that the expression of *CDKN1A* and *CDKN1B*, two  
225 regulators of cell quiescence (Heldt et al., 2018; Sgambato et al., 2000; Zhang et al.,  
226 2013), was similarly up regulated in 3D vs 2D co-cultures and in FL-B cells vs GC B-  
227 cells (Figure 6B). Moreover, *BCL2* was upregulated in DOHH2 after the 3D co-culture  
228 and was highly expressed in FL B cells (Figure 6C).

229 The hypoxic tumor environment has been often reproduced in 3D tumor *in vitro*  
230 models (Benien and Swami, 2014). We confirmed this observation in our lymphoma  
231 3D model, since both the upstream HIF1A transduction pathway regulator (*EGLN1*)  
232 and some HIF1A target genes (*VEGF*, *CXCR4*) were upregulated compared with 2D  
233 co-culture condition, reflecting, at least in part, the expression pattern obtained in FL  
234 B cells compared with normal CC (Figure 6D and E).

235 FL is a disseminated disease and we thus sought to determine the impact of 3D  
236 architecture on the expression of genes involved in cell confinement or cell migration.  
237 Interestingly, *RGS13*, known to limit GC size and GC B-cell number by interfering  
238 with *CXCL12* and *CXCL13* signals (Hwang et al., 2013), was specifically  
239 downregulated in 3D co-cultures and FL B cells. Conversely, *CXCR4* expression was  
240 similarly upregulated in FL-spheroids and FL B cells (Figure 6E).

241 Activation of the NF- $\kappa$ B pathway has been extensively described in B-NHL  
242 (Kennedy and Klein, 2018), leading us to investigate the expression of this pathway

243 in our 3D model. Our analyses revealed an upregulation of the noncanonical (*RELB*)  
244 NF- $\kappa$ B pathway in spheroids compared to 2D co-cultures. Concomitantly, the  
245 expression of *TNFAIP3*, a negative regulator of the canonical NF- $\kappa$ B pathway, as  
246 well as that of *BCL21A* and *CFLAR*, two target genes of NF- $\kappa$ B, were increased in 3D  
247 compared to 2D co-cultures (Figure 6F). These results suggest that a functional non-  
248 canonical NF- $\kappa$ B pathway is activated in FL-spheroids.

249 Collectively, these results suggest that the co-culture of DOHH2 with TSC in 3D  
250 exhibits high degree of similarity with FL biopsies and partly mimics the lymphoma  
251 niche.

#### 252 **4) B-NHL sensitivity to chemotherapy in 3D vs 2D cell culture**

253 We wondered whether the 3D architecture could alter the drug response of  
254 lymphoma B cells. For that purpose, we evaluated the effect of doxorubicin, one of  
255 the components of the classical polychemotherapy used in B-NHL (CHOP), on the  
256 cell death of B-NHL cell lines cultured in 2D or 3D in the absence or presence of  
257 stromal cells. As shown in Figure 7A, we observed that the induction of apoptosis by  
258 doxorubicin tested at a concentration corresponding to its EC50 for the different cell  
259 lines (Figure S5), was abolished or significantly decreased in cells cultured in 3D  
260 compared to 2D. Based on our results showing that *BCL2* expression was  
261 upregulated in FL spheroids, we then tested the effect of a BCL2 inhibitor. ABT-199  
262 induced massive cell death in DOHH2 co-cultured in 2D with or without stromal cells,  
263 as well as in 3D co-cultures, suggesting that malignant B cells retained their  
264 dependence on BCL2 expression for survival (Figure 7B).

265 Altogether, these results reveal that our 3D lymphoma model may be useful to  
266 perform precision medicine or drug screening.

## 267 **DISCUSSION**

268           Lymphomas develop as complex cell structures including tumor cells and their  
269 microenvironment within mechanically constraint lymph nodes (LN). Previous  
270 lymphoma spheroid models incorporating only malignant B cells (Decaup et al., 2013;  
271 Gravelle et al., 2014) have already suggested that the 3D cell architecture is a key  
272 feature for the regulation of lymphoma growth and therapeutic response. LN are  
273 highly dynamic structures expanding and becoming mechanically stiff under immune  
274 cell recruitment and proliferation, whereas immune response resolution is associated  
275 with LN contraction and return to a baseline of mechanical softness (Fletcher et al.,  
276 2015). LN mechanical properties rely on several determinants including the external  
277 constraint of the capsule and the internal tension created by the TSC network of  
278 specialized myofibroblasts able to produce and contract ECM. Moreover,  
279 mechanosensing has been recently demonstrated to control T-cell activation and  
280 metabolism (Meng et al., 2020) together with mechanical forces are involved in TCR  
281 (Hu and Butte, 2016) and BCR (Apoorva et al., 2018) signaling. Mouse models of FL  
282 and DLBCL cannot entirely recapitulate the biology of these tumors (Ramezani-Rad  
283 and Rickert, 2017) and, due to their inherent complexity and cost, they are not  
284 suitable to study specific cellular interactions contributing to the organization of  
285 lymphoma cell niche or to perform drug screening. The development of 3D lymphoma  
286 models including mechanical constraints is therefore of particular relevance to  
287 advance the understanding and treatment of these neoplasia. In the present work,  
288 we adapted a microfluidic approach to recapitulate the lymphoma microenvironment  
289 in hollow, permeable alginate shells, forming high-throughput (~5000/s), size-  
290 controlled, and easy to handle spheroids (Alessandri et al., 2013). Such a strategy is  
291 ideally suited for drug testing and the versatility of the technique allows generating

292 3D monocultures (i.e. from tumor B cells only) or co-cultures with human stromal  
293 cells, and to evaluate the impact of ECM.

294 First, the proliferation of malignant B cells alone within spheroids results in  
295 cohesive multicellular aggregates promoted by the over-secretion of ECM in 3D  
296 compared to 2D cultures. Although expression and secretion of ECM have been  
297 mainly described in stromal cells, we demonstrated here that lymphoma B cells  
298 display a similar ability, as already proposed for normal plasmablasts (Della-Torre et  
299 al., 2020) and plasma cells (Tancred et al., 2009), or leukemic B cells (Mikaelsson et  
300 al., 2005). How ECM expression is regulated remains unclear. We could however  
301 hypothesize that it may originate from the activation of a mechanotransduction  
302 pathway as already described in other cell types (Coplen et al., 2003; He et al.,  
303 2004). Remarkably, alginate capsules are elastic, meaning that cell growth past  
304 confluence dilates the capsule, which conversely applies a compressive force onto  
305 the spheroid (Alessandri et al., 2013). Although not investigated in depth, we  
306 qualitatively observed that the cohesion of spheroids was stronger for post-confluent  
307 capsules, which would support this mechanotransduction hypothesis.

308 Second, as previously reported using other 3D models, some B-cell lines,  
309 including DOHH2, were unable to grow and form spheroids when maintained alone in  
310 capsules, reproducing the strong dependency of FL on their niche for survival and  
311 growth. Guided by our previous studies showing that lymphoid-like stromal cells have  
312 a supportive effect on FL B cells (Ame-Thomas et al., 2007; Gallouet et al., 2014;  
313 Guilloton et al., 2012), we added TSC to generate hybrid stroma-tumor 3D lymphoma  
314 models. Interestingly, our 3D model reproduced the different levels of NHL  
315 microenvironment dependency, mimicking the biology of aggressive versus indolent  
316 lymphomas (Scott and Gascoyne, 2014). By contrast with other 3D culture

317 approaches that consist in embedding cells in an ECM scaffold (Gravelle et al., 2014;  
318 Purwada et al., 2015; Sabhachandani et al., 2019; Tian et al., 2015), our alginate  
319 spheroid model allows cell motions and interactions, leading to an early self-  
320 organization of a stroma-tumor B cell network that could organize localized 3D niches  
321 promoting cell interactions within the spheroids. Besides favoring or allowing  
322 malignant B-cell growth, the 3D co-culture was also associated with coevolution of  
323 stromal cells. In particular, TSC displayed increased podoplanin expression in 3D,  
324 mimicking the phenotype of FL-infiltrating stromal cells (Pandey et al., 2017),  
325 whereas such induction was not observed in 2D co-culture. Podoplanin is a  
326 transmembrane glycoprotein known to mediate the lymphoid stromal cell contractile  
327 function within LN (Astarita et al., 2015). It is thus tempting to speculate that  
328 podoplanin upregulation could contribute to the regulation of spheroid mechanical  
329 constraints. Production of TNF by malignant B cells has been proposed as a key  
330 mechanism of their dynamic interaction with stromal cells, leading to the upregulation  
331 of podoplanin, CCL2, and IL-8 in 2D culture conditions *in vitro* (Guilloton et al., 2012).  
332 However, neither TNF nor LT were found upregulated in DOHH2 maintained in 3D  
333 culture (data not shown), confirming a recent work performed on composite hydrogel-  
334 based lymphoma spheroids (Sabhachandani et al., 2019), suggesting that other  
335 soluble factors, but also 3D architecture and spatial constraints could contribute to  
336 the reprogramming of stromal cells.

337 Overall, the analysis of B-cell gene expression profile within spheroids  
338 revealed a profound shift associated with the transition from a 2D to a 3D context,  
339 mimicking the phenotype of primary FL B cells. The drop of B-cell proliferation that  
340 took place when cells filled the capsule was associated with an upregulation of  
341 quiescence genes also strongly expressed by FL B cells in agreement with their

342 indolent phenotype. Even in the absence of a necrotic core within spheroids, the  
343 increase of *EGLN1* and *VEGF* expression could reflect a response to hypoxia, a  
344 process associated with a limitation of energy consumption through reduction of cell  
345 proliferation and DNA repair (Goda et al., 2003; Koshiji et al., 2004). Such  
346 association of response to hypoxia and quiescence has been previously described in  
347 a 3D model where spheroids were generated by the hanging drop method with  
348 lymphoma B cells alone (Gravelle et al., 2014). Interestingly, *BCL2* was found  
349 upregulated in 3D spheroids and has been previously shown to display anti-  
350 proliferative effects in normal and malignant B cells (Tellier et al., 2014; Zinkel et al.,  
351 2006), suggesting that it could contribute to the decrease of cell proliferation. Even if  
352 the t(14;18) is the main driver of *BCL2* deregulation in FL, *BCL2* expression shows a  
353 high level of inter- and intra-tumoral heterogeneity and is correlated with IgH  
354 expression and NF- $\kappa$ B activation (Barreca et al., 2014; Heckman et al., 2002).  
355 Accordingly, we highlighted an upregulation of *RELB* and NF- $\kappa$ B target genes in 3D  
356 co-cultures, indicating that the NF- $\kappa$ B pathway was activated in lymphoma spheroids.  
357 Of note, a recent study revealed that fluid shear stress upregulates BCR expression  
358 and signaling in ABC-DLBCL (Apoorva et al., 2018), suggesting that engagement of  
359 BCR/NF- $\kappa$ B/*BCL2* loop by biophysical forces could be a general feature of B-cell  
360 lymphomas. Finally, we described in our 3D model an upregulation of *CXCR4*,  
361 previously associated with FL B-cell migration, adhesion, and survival. Together with  
362 the reduction of *RGS13* involved in the organization of GC into dark and light zones  
363 and the limitation of GC size (Hwang et al., 2013; Shi et al., 2002), this could  
364 reproduce some of the factors sustaining FL dissemination and will require further  
365 investigations.



366 BCL2 expression is a key determinant of response to therapy in FL patients  
367 (Barreca et al., 2014). Moreover, the 3D-induced drug resistance has been already  
368 reported in solid cancers and hematological malignancies (Desoize, 2000; Gravelle et  
369 al., 2014; Tian et al., 2015). We confirmed here that the sensitivity to doxorubicin  
370 dramatically dropped when cells were cultured in 3D compared to 2D in all  
371 investigated B NHL cell lines. By contrast, the pro-apoptotic activity of ABT-199,  
372 mediating the dissociation of BCL2 with the proapoptotic BH3 only proteins, was  
373 maintained in 3D co-cultures despite BCL2 upregulation suggesting that ABT-199  
374 might be considered as a good alternative for FL patient treatment. More generally,  
375 the cellular capsule technology adapted for lymphoma 3D culture seems a useful tool  
376 to screen new therapeutic approaches.

377 In summary, we report the development of a new lymphoma 3D model,  
378 including stromal cells and ECM, and recapitulating the dynamic crosstalk between  
379 tumor cells and their supportive microenvironment. The versatility of this high-  
380 throughput platform makes it possible to evaluate the role of various ECM  
381 components, stromal cell subtypes, and soluble factors on the spatial organization  
382 and function of the lymphoma niche. Moreover, this approach is particularly suitable  
383 for the testing of new therapeutic agents in B-NHL.

384

## 385 **MATERIALS AND METHODS**

### 386 **Reagents and antibodies**

387 Alginic acid sodium salt from brown algae, D-Sorbitol and CaCl<sub>2</sub> hexahydrate,  
388 EGTA, paraformaldehyde were supplied by Merck (Fontenay sous bois, France).  
389 Matrigel was provided by Corning (UGAP, France). Propidium iodide and Phalloidin-  
390 Alexa 594 were from Thermo Fisher Scientific (Courtaboeuf, France). Hoechst 33258  
391 and ABT-199 were purchased from Tocris Bioscience (Lille, France). The  
392 comprehensive cancer center pharmacy department of the Institut Bergonié kindly  
393 provided doxorubicin. APC Annexin V was from BD Biosciences (Le pont de Claix,  
394 France).

395 Rabbit polyclonal anti-laminin, rabbit polyclonal anti-fibronectin, rabbit  
396 monoclonal anti-human collagen I and chicken polyclonal anti-GFP antibodies were  
397 supplied by Abcam (Paris, France). Mouse anti-human CD20 APC-H7 and mouse  
398 anti-human CD73 PE were from e-Bioscience (Thermo Fisher Scientific). Monoclonal  
399 mouse anti-human Ki67 was from Dako Agilent Technologies (Les Ulis, France) and  
400 rabbit polyclonal anti-cleaved caspase 3 antibody was provided by Cell Signaling  
401 Technology (Ozyme, Saint Cyr l'école, France). All Alexa-conjugated secondary  
402 antibodies were purchased from Thermo Fisher Scientific.

403

### 404 **Encapsulation procedure**

405 Cell encapsulation was performed by adapting the protocols from (Alessandri  
406 et al., 2016; Doméjean et al., 2016; Trushko et al., 2020). Briefly, it includes the  
407 fabrication of the device, the preparation of the solutions and the operation itself for  
408 cellular capsules formation.

409 First, the microfluidic device was printed with EnvisionTEC Micro Hi-Res Plus  
410 3D printer (Arkety3D, Le Raincy, France) using the resin HTM140V2 (EnvisionTEC),  
411 with the following printing parameters: burn-in range thickness 400 $\mu$ m, base plate of  
412 300 $\mu$ m, and exposure time 3000ms. The printed device was washed using propanol  
413 and air-dried. In parallel, a glass capillary was pulled using a micropipette puller (P30,  
414 Sutter Instrument, Micro Mecanique SAS, Saint Germain en Laye, France), then cut  
415 and polished with micro-abrasive films (1 $\mu$ m grain, 3M) to reach the desired tip  
416 diameter (typically between 130 and 180  $\mu$ m). This glass tip, which serves as a  
417 nozzle for the encapsulation device, was hydrophobized (1H,1H,2H,2H-  
418 Perfluorooctyltrimethoxysilane, ABCR) following standard protocols (Perret et al.,  
419 2002) and glued to the exit of the microfluidic plastic device with epoxyglue EA M-  
420 31CL (Loctite).

421 To run an encapsulation, the microfluidic device is connected to three syringes  
422 (10MDR-LL-GT SGE, Analytical Science, Milton Keynes, UK) mounted on pumps  
423 (Nemesys, Cetoni GmbH, Korbussen, Germany) for flow rate control. Three different  
424 solutions are injected into the three coaxial cones of the device. The outermost cone  
425 contains the alginate solution, which is prepared by dissolving 2% wt/vol sodium  
426 alginate (Protanal LF200S) in water and by adding 0.5mM SDS surfactant (VWR  
427 International, Fontenay sous bois, France). The solution was filtered at 1 $\mu$ m (glass  
428 filters, Pall Life Science) and stored at 4 °C. The intermediate cone contains a 300  
429 mM sorbitol (Merck) solution. The innermost cone contains cells suspended in a  
430 sorbitol solution or cells/Matrigel/sorbitol solution (when ECM is needed) in a ratio of  
431 2:1:2 (v/v). Lymphoma B cells lines were taken from cell suspension routinely  
432 cultured while adherent stromal cells were detached from the culture flask with  
433 trypsin-EDTA (Thermo Fisher Scientific). After rinse, cells were centrifuged and

434 counted. For encapsulation of lymphoma cells or stromal cells only (mono-culture), a  
435 suspension of  $2 \times 10^6$  cells were resuspended in culture DMEM (Thermo Fisher  
436 Scientific). When adherent and lymphoma B cells were co-encapsulated, a  
437 suspension of  $2 \times 10^6$  cells of each cell type were used. 200 $\mu$ L of the cell suspension  
438 is injected into a cooling part to maintain Matrigel liquid (Alessandri et al., 2016). The  
439 flow rates are set to 45mL/h, 45mL/h and 30mL/h for the alginate, sorbitol and cell  
440 suspension, respectively. The device is positioned 40-50 cm above a petri dish  
441 containing 100mM CaCl<sub>2</sub> solution for capsule gelling and collection. To improve  
442 capsule shape and monodispersity an alginate charging part and copper ring (21mm  
443 OD, RadioSpares), both connected to a high voltage (2 kV) generator (Stanford  
444 Research PS350, Acal BFI, France) are introduced, as described in (Trushko et al.,  
445 2020). The charged formed droplets passing through the copper ring under electrical  
446 tension get deflected as they cross the ring, creating a splay-like jet that prevents  
447 capsule coalescence. Once formed inside the calcium bath, capsules are washed  
448 with DMEM and transferred to cell culture medium.

449

#### 450 **Cell lines, suspension, monolayer and encapsulated cell culture**

451 Stromal cells (TSC) were isolated as previously described (Ame-Thomas et  
452 al., 2007; Guilloton et al., 2012) from human tonsils collected from children  
453 undergoing routine tonsillectomy, considered as surgical wastes. GFP-expressing  
454 TSC cells were established after transduction with lentivirus carrying the pUltra (gift  
455 from Malcolm Moore (Addgene plasmid # 24129; <http://n2t.net/addgene:24129>;  
456 RRID: Addgene\_24129), which contained the enhanced GFP gene under the control  
457 of Ubc promoter and produced as previously described (WU and LU, 2007). TSC  
458 were transduced in RPMI supplemented with 2% FBS containing pUltra concentrated

459 lentiviral supernatant with MOI of 4. On the next day, the medium was replaced with  
460 standard culture medium. After one week, eGFP<sup>high</sup> TSC were isolated using a cell  
461 sorter (FACS Aria, BD Biosciences). For all the experiments reported in the present  
462 work, TSC were used from P9 to P13. DLBCL SU-DHL-4 and FL DOHH2 cell lines  
463 were obtained from the DSMZ cell collection (Braunschweig, Germany). HLY-1 cell  
464 line was kindly provided by Dr F. Meggetto (CRCT, Toulouse, France). Cells were  
465 routinely cultured in RPMI medium (Thermo Fisher Scientific), supplemented with  
466 10% FBS (Dutscher, Brumath, France) under humid atmosphere containing 5% CO<sub>2</sub>,  
467 with medium changed 3 times a week. One day prior to encapsulation, cells were  
468 cultured in DMEM supplemented with 10% FBS. Once cellular capsules were formed  
469 following the protocol described above, they were cultured in 75 cm<sup>2</sup> flasks in DMEM  
470 supplemented with 10% FBS under humid atmosphere containing 5% CO<sub>2</sub>, with  
471 medium changed 2 times a week. Depending on the type of experiments, capsules  
472 were sampled and transferred to dedicated culture supports, e.g. for imaging, or  
473 treated in bulk conditions and subsequently analyzed, e.g. for FACS.

474

#### 475 **Spheroid growth measurement**

476 At various post-encapsulation culture times, we selected about 200 capsules.  
477 Capsules were dissolved by incubation in PBS containing 1 mM EGTA and the  
478 spheroids were mechanically dissociated by pipetting. When spheroids were too  
479 cohesive, trypsin-EDTA was added to improve cell dissociation. The cell suspension  
480 was centrifuged and re-suspended in 200 µL of PBS and 50 µL of Precision Count  
481 Beads (BioLegend, Ozyme). The number of cells was then determined in a given cell  
482 suspension volume of 100 µL using flow cytometry (FACS Calibur, BD biosciences)  
483 according to the manufacturer's instructions. To evaluate the cell death in spheroids,

484 propidium iodide (PI) (10  $\mu$ g/mL) was added to the cell suspension and PI  
485 fluorescence was analyzed by flow cytometry using Cell Quest or FlowJo (BD  
486 biosciences).

487

## 488 **Immunofluorescence staining of spheroids**

### 489 *In capsule staining*

490 Capsules were fixed in DMEM w/o phenol red (Pan Biotech, Dutscher),  
491 containing 4% paraformaldehyde for 20 min at room temperature (RT). After rinsing,  
492 capsules were incubated for 30 min in DMEM w/o phenol red/ 0.1% triton X-100.  
493 Following a step of saturation with a solution containing DMEM w/o phenol red/ BSA  
494 1% /FBS 2% for 1h at RT, capsules were incubated with primary antibody overnight  
495 at 4°C under shaking. Primary antibody was revealed by incubation of capsules with  
496 secondary Alexa-coupled antibody for 2h at RT. Nuclei were stained by incubation of  
497 capsules with Hoechst 33258 for 30 min at RT. To determine the role of Matrigel in  
498 the stromal network establishment, immunofluorescence using a rabbit anti-human  
499 pan laminin antibody revealed by goat anti rabbit Alexa 633 secondary antibody, was  
500 performed to visualize Matrigel, stromal cells were GFP positive and nuclei was  
501 stained with Hoechst 33258. Z-stacks were acquired using a Zeiss LSM 510 meta  
502 confocal microscope with a 25x objective (N.A 0.7). 3D rendering was obtained using  
503 UCSF Chimera software (RBVI, San Francisco, USA).

504

### 505 *FFPE staining*

506 To analyze protein expression inside spheroids, immunofluorescence on  
507 FFPE (Formalin-Fixed Paraffin-Embedded) spheroids sections (3-5  $\mu$ m thick) were  
508 performed. Alginate shells were dissolved and spheroids were fixed as described

509 above. Spheroids were then pre-embedded in 2% agarose and further embedded in  
510 a paraffin block. Immunofluorescence staining was then performed as previously  
511 described (Andrique et al., 2019). Images were acquired using a Zeiss LSM 510  
512 meta confocal microscope (Zeiss, Göttingen, Germany) with a 25x objective (N.A  
513 0.7). Then images obtained were processed using Fiji.

514

### 515 **3D cell morphology quantification**

516 Capsules were fixed at various post-encapsulation culture times and each  
517 capsule was placed in an agarose well of the Universlide microscopy chamber  
518 (Alessandri et al., 2017), which allowed immobilization of the capsules as required for  
519 stable z-stack acquisition and medium throughput 3D imaging. Cell nuclei were  
520 stained with Hoechst 33258 and stromal cells were visualized by the GFP  
521 expression. Images were acquired using a Leica SP8 confocal microscope with a  
522 20X dry objective (NA 0.7). To measure the evolution of TSC complexity over time

523 two parameters were measured: the sphericity defined as  $\sqrt[3]{\frac{36 \times \pi \times \text{Volume of particle}^2}{\text{Surface of particle}^3}}$  and

524 the branchness defined as  $\frac{\text{Volume of particle convex hull}}{\text{Volume of particle}}$ . To obtain these values, we

525 applied a locally adjusted threshold to the green signal, performed 3D segmentation  
526 (3D suite plugin, Fiji (Ollion et al., 2013)). For the two parameters, the values of all  
527 “particles” contained in one capsule were averaged. Thus, each capsule was  
528 characterized by one mean value for sphericity and branchness. 10-18 capsules  
529 were analyzed per time point

530

### 531 **Multiplex fluorescence microscopy**

532 Patients were recruited under institutional review board approval following  
533 informed consent process according to the declaration of Helsinki and the French  
534 National Cancer Institute ethic committee recommendations. Tissue samples  
535 included tonsils collected from routine tonsillectomy, and lymph nodes obtained from  
536 grade 1-2 FL and from DLBCL patients.

537 Four-micrometer-thick whole-slide sections, obtained with a microtome  
538 (Histocore multicut Leicabiosystems, Nanterre, France) from FFPE tissue or  
539 spheroids blocks, were transferred onto plus-charged slides (VWR international),  
540 followed by multiplex immunofluorescence staining with a U DISCOVERY 5 plex  
541 immunofluorescence (Roche Diagnostics, Meylan, France). Three sequential rounds  
542 of staining were performed each including heat deactivation step, followed by  
543 incubation with primary antibody and corresponding HRP secondary antibody.  
544 Hence, rat anti-podoplanin (Thermo Fisher Scientific NZ-1.3), mouse Anti-PAX5  
545 antibody (Abcam ab224660), and sheep anti-transglutaminase (R&D AF4376)  
546 expressions were visualized on the same section using HRP enzyme mediated  
547 deposition of the tyramide coupled to rhodamine, DCC and FAM fluorophores (kits  
548 Ventana Medical Systems, Tucson, Ariz), respectively, that covalently binds to the  
549 tissue at the site of the reaction. After 3 sequential reactions, sections were  
550 counterstained with DAPI and coverslipped using fluoromount (Enzo Life Sciences,  
551 Farmingdale, NY, USA). Visualization was performed with the Nanozoomer  
552 (Hamamatsu Photonics, Massy, France) equipped with the multicolor fluorescence  
553 module.

554

555 **Cell co-culture and cell sorting:**



556 2D co-cultures were performed over 3 days.  $3 \times 10^5$  DOHH2 ( $1.5 \times 10^5$ /mL) were plated  
557 on  $5 \times 10^4$  TSC /cm<sup>2</sup> in 6 well plates. For cell sorting, cells were trypsinized (Thermo  
558 Fisher Scientific) for 12 min at 37 °C and washed with medium DMEM 10% FBS. 3D  
559 co-cultures were performed over 10 days. For cell sorting, after dissolution of the  
560 alginate shells, cells were rinsed with DMEM 10% FBS and centrifuged for 7 min at  
561 1700 rpm, incubated with trypsin at 37 °C for 15 min, and rinsed with medium DMEM  
562 10% FBS. Cells were stained for 20 min on ice with mouse anti-human CD20 APC-  
563 H7 and mouse anti-human CD73 PE. After DAPI staining, cell sorting was processed  
564 by the FACS Aria II (BD Biosciences).

565

#### 566 **RT q-PCR arrays**

567 After cell sorting, RNA extraction from DOHH2 co-cultured in 2D or 3D with  
568 TSC cells was done using Nucleospin RNA XS Micro kit (PN 740990) from Macherey  
569 Nagel (Hoerd, France). cDNA were synthesized using reverse transcription master  
570 mix (Fluidigm, USA, PN 100-6297), followed by gene expression preamplification  
571 with Fluidigm Preamp Master mix (PN 100-5744) and Taq Man assays and followed  
572 by RT-QPCR. Assay-on-demand primers, probes, and TaqMan gene expression  
573 Master Mix were obtained from Thermo Fisher Scientific. Gene expression was  
574 measured using 96.96 Dynamic Array™ IFCs and the BioMark™ HD System  
575 from Fluidigm, based on  $\Delta$ Ct calculation method. A tonsil pool was used as  
576 appropriate DOHH2 expression external control. For each sample, the Ct value for  
577 the gene of interest was determined and normalized to its respective mean value of  
578 housekeeping genes (*ABL1* and *GAPDH*). Data were represented through a  
579 heatmap using the pheatmap R package. In addition, differentially expressed genes

580 were analyzed in Affymetrix data sets comparing purified FL B cells and purified  
581 centrocytes (GSE85233 and GSE136249) (Pangault et al., 2020).

582

### 583 **Chemotherapeutic toxicity measurement**

584 To compare the drug toxicities between lymphoma cells cultured in  
585 suspension and in spheroids,  $0.5 \times 10^6$  cells/well co-cultured or not with  $5 \times 10^4$  TSC  
586 /cm<sup>2</sup> or 100 confluent spheroids were distributed in 6-well plates and treated or not  
587 with doxorubicin for 24h. Then, cell death was assessed by flow cytometry after  
588 Annexin V-APC labelling according to the manufacturer's instructions.

589

### 590 **Statistical analyses**

591 All data were expressed as means  $\pm$  SEM. The significance of differences was  
592 calculated using the parametric ANOVA or the non-parametric U-Mann and Whitney  
593 or Wilcoxon tests, as appropriate. (\*P<0.05, \*\*P<0.01, \*\*\*P<0.001, \*\*\*\*P<0.0001).  
594 Statistical analyses were performed using GraphPad Prism 8 software.

595

### 596 **FUNDINGS**

597 This work was supported by INSERM, University of Bordeaux, Ligue  
598 Régionale contre le Cancer (comités de Gironde, Charentes, Pyrénées, Landes), the  
599 Fondation ARC pour la Recherche sur le Cancer (Grant PGA1 RF20170205386),  
600 Emergence GSO Cancéropole, and SIRIC BRIO. SL is supported by Ligue Nationale  
601 contre le Cancer and C.L. is a recipient of a doctoral fellowship from the FHU CAMIn  
602 and LBB (Léa Broca-Brisson) of a master fellowship from CNRS GDR Imabio.

603

### 604 **ACKNOWLEDGMENTS**

605           We thank Stéphanie Durand-Panteix for her technical support with  
606 transduction experiments. We thank Atika Zouine and Vincent Pitard for technical  
607 assistance at the Flow cytometry facility, CNRS UMS 3427, INSERM US 005, Univ.  
608 Bordeaux, F-33000 Bordeaux, France. We acknowledge the Bordeaux Imaging  
609 Center, a service unit of the CNRS-INSERM and Bordeaux University, member of the  
610 national infrastructure France BioImaging supported by the French Research Agency  
611 (ANR-10-INBS-04). A part of immunofluorescence study was performed on the  
612 Microscopy Rennes Imaging Center (MRic-ALMF; UMS 6480 Biosit, Rennes, France)  
613 member of the national infrastructure France-BioImaging. Cell sorting was performed  
614 at the Biosit Flow Cytometry and Cell Sorting Facility CytomeTRI (UMS 6480 Biosit,  
615 Rennes, France).

616

617

618 **REFERENCES**

- 619 Alessandri, K., Andrique, L., Feyeux, M., Bikfalvi, A., Nassoy, P., Recher, G., 2017.  
620 All-in-one 3D printed microscopy chamber for multidimensional imaging, the  
621 UniverSlide. *Sci.Rep.* 7, 42378. <https://doi.org/10.1038/srep42378>
- 622 Alessandri, K., Feyeux, M., Gurchenkov, B., Delgado, C., Trushko, A., Krause, K.H.,  
623 Vignjevic, D., Nassoy, P., Roux, A., 2016. A 3D printed microfluidic device for  
624 production of functionalized hydrogel microcapsules for culture and differentiation  
625 of human Neuronal Stem Cells (hNSC). *Lab Chip.* 16, 1593–1604.  
626 <https://doi.org/10.1039/c6lc00133e>
- 627 Alessandri, K., Sarangi, B.R., Gurchenkov, V.V., Sinha, B., Kiessling, T.R., Fetler, L.,  
628 Rico, F., Scheuring, S., Lamaze, C., Simon, A., Geraldo, S., Vignjevic, D.,  
629 Domejean, H., Rolland, L., Funfak, A., Bibette, J., Bremond, N., Nassoy, P., 2013.  
630 Cellular capsules as a tool for multicellular spheroid production and for  
631 investigating the mechanics of tumor progression in vitro.  
632 *Proc.Natl.Acad.Sci.U.S.A* 110, 14843–14848.  
633 <https://doi.org/10.1073/pnas.1309482110>
- 634 Alizadeh, A.A., Eisen, M.B., Davis, R.E., Ma, C., Lossos, I.S., Rosenwald, A.,  
635 Boldrick, J.C., Sabet, H., Tran, T., Yu, X., Powell, J.I., Yang, L., Marti, G.E.,  
636 Moore, T., Hudson, J., Lu, L., Lewis, D.B., Tibshirani, R., Sherlock, G., Chan,  
637 W.C., Greiner, T.C., Weisenburger, D.D., Armitage, J.O., Warnke, R., Levy, R.,  
638 Wilson, W., Grever, M.R., Byrd, J.C., Botstein, D., Brown, P.O., Staudt, L.M.,  
639 2000. Distinct types of diffuse large B-cell lymphoma identified by gene expression  
640 profiling. *Nature* 403, 503–511. <https://doi.org/10.1038/35000501>
- 641 Ame-Thomas, P., Maby-El, H.H., Monvoisin, C., Jean, R., Monnier, D., Caulet-  
642 Maugendre, S., Guillaudeux, T., Lamy, T., Fest, T., Tarte, K., 2007. Human

643 mesenchymal stem cells isolated from bone marrow and lymphoid organs support  
644 tumor B-cell growth: role of stromal cells in follicular lymphoma pathogenesis.  
645 *Blood* 109, 693–702. <https://doi.org/10.1182/blood-2006-05-020800>

646 Andrique, L., Recher, G., Alessandri, K., Pujol, N., Feyeux, M., Bon, P., Cognet, L.,  
647 Nassoy, P., Bikfalvi, A., 2019. A model of guided cell self-organization for rapid  
648 and spontaneous formation of functional vessels. *Science Advances* 5.  
649 <https://doi.org/10.1126/sciadv.aau6562>

650 Apoorva, F., Loiben, A.M., Shah, S.B., Purwada, A., Fontan, L., Goldstein, R., Kirby,  
651 B.J., Melnick, A.M., Cosgrove, B.D., Singh, A., 2018. How Biophysical Forces  
652 Regulate Human B Cell Lymphomas. *Cell Reports* 23, 499–511.  
653 <https://doi.org/10.1016/j.celrep.2018.03.069>

654 Astarita, J.L., Cremasco, V., Fu, J., Darnell, M.C., Peck, J.R., Nieves-Bonilla, J.M.,  
655 Song, K., Kondo, Y., Woodruff, M.C., Gogineni, A., Onder, L., Ludewig, B.,  
656 Weimer, R.M., Carroll, M.C., Mooney, D.J., Xia, L., Turley, S.J., 2015. The CLEC-  
657 2–podoplanin axis controls the contractility of fibroblastic reticular cells and lymph  
658 node microarchitecture. *Nature Immunology* 16, 75–84.  
659 <https://doi.org/10.1038/ni.3035>

660 Barreca, A., Martinengo, C., Annaratone, L., Righi, L., Chiappella, A., Ladetto, M.,  
661 Demurtas, A., Chiusa, L., Stacchini, A., Crosetto, N., van Oudenaarden, A.,  
662 Chiarle, R., 2014. Inter- and intratumoral heterogeneity of BCL2 correlates with  
663 IgH expression and prognosis in follicular lymphoma. *Blood Cancer Journal* 4,  
664 e249–e249. <https://doi.org/10.1038/bcj.2014.67>

665 Benien, P., Swami, A., 2014. 3D tumor models: history, advances and future  
666 perspectives. *Future Oncol* 10, 1311–1327. <https://doi.org/10.2217/fon.13.274>

- 667 Bissell, M.J., Radisky, D., 2001. Putting tumours in context. *Nat.Rev.Cancer* 1, 46–  
668 54. <https://doi.org/10.1038/35094059>
- 669 Chen, J., Alexander, J.S., Orr, A.W., 2012. Integrins and Their Extracellular Matrix  
670 Ligands in Lymphangiogenesis and Lymph Node Metastasis. *Int J Cell Biol* 2012.  
671 <https://doi.org/10.1155/2012/853703>
- 672 Coplen, D.E., Macarak, E.J., Howard, P.S., 2003. Matrix synthesis by bladder smooth  
673 muscle cells is modulated by stretch frequency. *In Vitro Cell.Dev.Biol.-Animal* 39,  
674 157–162. <https://doi.org/10.1007/s11626-003-0010-3>
- 675 Däster, S., Amatruda, N., Calabrese, D., Ivanek, R., Turrini, E., Droeser, R.A., Zajac,  
676 P., Fimognari, C., Spagnoli, G.C., Iezzi, G., Mele, V., Muraro, M.G., 2016.  
677 Induction of hypoxia and necrosis in multicellular tumor spheroids is associated  
678 with resistance to chemotherapy treatment. *Oncotarget* 8, 1725–1736.  
679 <https://doi.org/10.18632/oncotarget.13857>
- 680 Decaup, E., Jean, C., Laurent, C., Gravelle, P., Fruchon, S., Capilla, F., Marrot, A., Al  
681 Saati, T., Frenois, F.-X., Laurent, G., Klein, C., Varoqueaux, N., Savina, A.,  
682 Fournié, J.-J., Bezombes, C., 2013. Anti-tumor activity of obinutuzumab and  
683 rituximab in a follicular lymphoma 3D model. *Blood Cancer J* 3, e131.  
684 <https://doi.org/10.1038/bcj.2013.32>
- 685 Decaup, E., Rossi, C., Gravelle, P., Laurent, C., Bordenave, J., Tosolini, M., Tourette,  
686 A., Perrial, E., Dumontet, C., Poupot, M., Klein, C., Savina, A., Fournié, J.-J.,  
687 Bezombes, C., 2019. A Tridimensional Model for NK Cell-Mediated ADCC of  
688 Follicular Lymphoma. *Front. Immunol.* 10.  
689 <https://doi.org/10.3389/fimmu.2019.01943>
- 690 Della-Torre, E., Rigamonti, E., Perugino, C., Baghai-Sain, S., Sun, N., Kaneko, N.,  
691 Maehara, T., Rovati, L., Ponzoni, M., Milani, R., Lanzillotta, M., Mahajan, V.,

- 692 Mattoo, H., Molineris, I., Deshpande, V., Stone, J.H., Falconi, M., Manfredi, A.A.,  
693 Pillai, S., 2020. B lymphocytes directly contribute to tissue fibrosis in patients with  
694 IgG4-related disease. *Journal of Allergy and Clinical Immunology* 145, 968-  
695 981.e14. <https://doi.org/10.1016/j.jaci.2019.07.004>
- 696 Desoize, B., 2000. Multicellular resistance: a paradigm for clinical resistance? *Critical*  
697 *Reviews in Oncology/Hematology* 36, 193–207. <https://doi.org/10.1016/S1040->  
698 8428(00)00086-X
- 699 Doméjean, H., Pierre, M. de la M.S., Funfak, A., Atrux-Tallau, N., Alessandri, K.,  
700 Nassoy, P., Bibette, J., Bremond, N., 2016. Controlled production of sub-millimeter  
701 liquid core hydrogel capsules for parallelized 3D cell culture. *Lab Chip* 17, 110–  
702 119. <https://doi.org/10.1039/C6LC00848H>
- 703 Fletcher, A.L., Acton, S.E., Knoblich, K., 2015. Lymph node fibroblastic reticular cells  
704 in health and disease. *Nat. Rev. Immunol.* 15, 350–361.  
705 <https://doi.org/10.1038/nri3846>
- 706 Fowler, N.H., Cheah, C.Y., Gascoyne, R.D., Gribben, J., Neelapu, S.S., Ghia, P.,  
707 Bollard, C., Ansell, S., Curran, M., Wilson, W.H., O'Brien, S., Grant, C., Little, R.,  
708 Zenz, T., Nastoupil, L.J., Dunleavy, K., 2016. Role of the tumor microenvironment  
709 in mature B-cell lymphoid malignancies. *Haematologica* 101, 531–540.  
710 <https://doi.org/10.3324/haematol.2015.139493>
- 711 Gallouet, A.S., Travert, M., Bresson-Bepoldin, L., Guilloton, F., Pangault, C., Caulet-  
712 Maugendre, S., Lamy, T., Tarte, K., Guillaudeux, T., 2014. COX-2-independent  
713 effects of celecoxib sensitize lymphoma B cells to TRAIL-mediated apoptosis.  
714 *Clin.Cancer Res.* 20, 2663–2673. <https://doi.org/10.1158/1078-0432.CCR-13-2305>

- 715 Goda, N., Dozier, S.J., Johnson, R.S., 2003. HIF-1 in Cell Cycle Regulation,  
716 Apoptosis, and Tumor Progression. *Antioxidants & Redox Signaling* 5, 467–473.  
717 <https://doi.org/10.1089/152308603768295212>
- 718 Gravelle, P., Jean, C., Familiades, J., Decaup, E., Blanc, A., Bezombes-Cagnac, C.,  
719 Laurent, C., Savina, A., Fournié, J.-J., Laurent, G., 2014. Cell growth in  
720 aggregates determines gene expression, proliferation, survival, chemoresistance,  
721 and sensitivity to immune effectors in follicular lymphoma. *Am. J. Pathol.* 184,  
722 282–295. <https://doi.org/10.1016/j.ajpath.2013.09.018>
- 723 Guilloton, F., Caron, G., Menard, C., Pangault, C., Ame-Thomas, P., Dulong, J., De,  
724 V.J., Rossille, D., Henry, C., Lamy, T., Fouquet, O., Fest, T., Tarte, K., 2012.  
725 Mesenchymal stromal cells orchestrate follicular lymphoma cell niche through the  
726 CCL2-dependent recruitment and polarization of monocytes. *Blood* 119, 2556–  
727 2567. <https://doi.org/10.1182/blood-2011-08-370908>
- 728 He, Y., Macarak, E.J., Korostoff, J.M., Howard, P.S., 2004. Compression and  
729 Tension: Differential Effects on Matrix Accumulation by Periodontal Ligament  
730 Fibroblasts In Vitro. *Connective Tissue Research* 45, 28–39.  
731 <https://doi.org/10.1080/03008200490278124>
- 732 Heckman, C.A., Mehew, J.W., Boxer, L.M., 2002. NF-kappaB activates Bcl-2  
733 expression in t(14;18) lymphoma cells. *Oncogene* 21, 3898–3908.  
734 <https://doi.org/10.1038/sj.onc.1205483>
- 735 Heldt, F.S., Barr, A.R., Cooper, S., Bakal, C., Novák, B., 2018. A comprehensive  
736 model for the proliferation–quiescence decision in response to endogenous DNA  
737 damage in human cells. *PNAS* 115, 2532–2537.  
738 <https://doi.org/10.1073/pnas.1715345115>



- 739 Hu, K.H., Butte, M.J., 2016. T cell activation requires force generation. *The Journal of*  
740 *cell biology* 213, 535–542. <https://doi.org/10.1083/jcb.201511053>
- 741 Huet, S., Sujobert, P., Salles, G., 2018. From genetics to the clinic: a translational  
742 perspective on follicular lymphoma. *Nat Rev Cancer* 18, 224–239.  
743 <https://doi.org/10.1038/nrc.2017.127>
- 744 Hwang, I.-Y., Hwang, K.-S., Park, C., Harrison, K.A., Kehrl, J.H., 2013. Rgs13  
745 Constrains Early B Cell Responses and Limits Germinal Center Sizes. *PLoS ONE*  
746 8, e60139. <https://doi.org/10.1371/journal.pone.0060139>
- 747 Kennedy, R., Klein, U., 2018. Aberrant Activation of NF- $\kappa$ B Signalling in Aggressive  
748 Lymphoid Malignancies. *Cells* 7, 189. <https://doi.org/10.3390/cells7110189>
- 749 Koshiji, M., Kageyama, Y., Pete, E.A., Horikawa, I., Barrett, J.C., Huang, L.E., 2004.  
750 HIF-1 $\alpha$  induces cell cycle arrest by functionally counteracting Myc. *EMBO J* 23,  
751 1949–1956. <https://doi.org/10.1038/sj.emboj.7600196>
- 752 Meng, K.P., Majedi, F.S., Thauland, T.J., Butte, M.J., 2020. Mechanosensing through  
753 YAP controls T cell activation and metabolism. *Journal of Experimental Medicine*  
754 217, e20200053. <https://doi.org/10.1084/jem.20200053>
- 755 Mikaelsson, E., Danesh-Manesh, A.H., Luppert, A., Jeddi-Tehrani, M., Rezvany, M.-  
756 R., Sharifian, R.A., Safaie, R., Roohi, A., Osterborg, A., Shokri, F., Mellstedt, H.,  
757 Rabbani, H., 2005. Fibromodulin, an extracellular matrix protein: characterization  
758 of its unique gene and protein expression in B-cell chronic lymphocytic leukemia  
759 and mantle cell lymphoma. *Blood* 105, 4828–4835. [https://doi.org/10.1182/blood-](https://doi.org/10.1182/blood-2004-10-3941)  
760 [2004-10-3941](https://doi.org/10.1182/blood-2004-10-3941)
- 761 Ollion, J., Cochenec, J., Loll, F., Escudé, C., Boudier, T., 2013. TANGO: a generic  
762 tool for high-throughput 3D image analysis for studying nuclear organization.  
763 *Bioinformatics* 29, 1840–1841. <https://doi.org/10.1093/bioinformatics/btt276>

- 764 Pandey, S., Mourcin, F., Marchand, T., Nayar, S., Guirriec, M., Pangault, C.,  
765 Monvoisin, C., Amé-Thomas, P., Guilloton, F., Dulong, J., Coles, M., Fest, T.,  
766 Mottok, A., Barone, F., Tarte, K., 2017. IL-4/CXCL12 loop is a key regulator of  
767 lymphoid stroma function in follicular lymphoma. *Blood* 129, 2507–2518.  
768 <https://doi.org/10.1182/blood-2016-08-737239>
- 769 Pangault, C., Amé-Thomas, P., Rossille, D., Dulong, J., Caron, G., Nonn, C.,  
770 Chatonnet, F., Desmots, F., Launay, V., Lamy, T., Fest, T., Tarte, K., 2020.  
771 Integrative Analysis of Cell Crosstalk within Follicular Lymphoma Cell Niche:  
772 Towards a Definition of the FL Supportive Synapse. *Cancers* 12, 2865.  
773 <https://doi.org/10.3390/cancers12102865>
- 774 Perret, E., Leung, A., Morel, A., Feracci, H., Nassoy, P., 2002. Versatile Decoration  
775 of Glass Surfaces To Probe Individual Protein–Protein Interactions and Cellular  
776 Adhesion. *Langmuir* 18, 846–854. <https://doi.org/10.1021/la015601y>
- 777 Purwada, A., Jaiswal, M.K., Ahn, H., Nojima, T., Kitamura, D., Gaharwar, A.K.,  
778 Cerchietti, L., Singh, A., 2015. Ex vivo engineered immune organoids for  
779 controlled germinal center reactions. *Biomaterials* 63, 24–34.  
780 <https://doi.org/10.1016/j.biomaterials.2015.06.002>
- 781 Ramezani-Rad, P., Rickert, R.C., 2017. Murine models of germinal center derived-  
782 lymphomas. *Current Opinion in Immunology, Lymphocyte development and*  
783 *activation* \* *Tumour immunology* 45, 31–36.  
784 <https://doi.org/10.1016/j.coi.2016.12.002>
- 785 Sabhachandani, P., Sarkar, S., Mckenney, S., Ravi, D., Evens, A.M., Konry, T., 2019.  
786 Microfluidic assembly of hydrogel-based immunogenic tumor spheroids for  
787 evaluation of anticancer therapies and biomarker release. *Journal of Controlled*  
788 *Release* 295, 21–30. <https://doi.org/10.1016/j.jconrel.2018.12.010>

- 789 Scott, D.W., Gascoyne, R.D., 2014. The tumour microenvironment in B cell  
790 lymphomas. *Nature Reviews Cancer* 14, 517–534. <https://doi.org/10.1038/nrc3774>
- 791 Sehn, L.H., Gascoyne, R.D., 2015. Diffuse large B-cell lymphoma: optimizing  
792 outcome in the context of clinical and biologic heterogeneity. *Blood* 125, 22–32.  
793 <https://doi.org/10.1182/blood-2014-05-577189>
- 794 Sgambato, A., Cittadini, A., Faraglia, B., Weinstein, I.B., 2000. Multiple functions of  
795 p27Kip1 and its alterations in tumor cells: a review. *Journal of Cellular Physiology*  
796 183, 18–27. [https://doi.org/10.1002/\(SICI\)1097-4652\(200004\)183:1<18::AID-  
797 JCP3>3.0.CO;2-S](https://doi.org/10.1002/(SICI)1097-4652(200004)183:1<18::AID-JCP3>3.0.CO;2-S)
- 798 Shi, G.-X., Harrison, K., Wilson, G.L., Moratz, C., Kehrl, J.H., 2002. RGS13  
799 Regulates Germinal Center B Lymphocytes Responsiveness to CXC Chemokine  
800 Ligand (CXCL)12 and CXCL13. *J Immunol* 169, 2507–2515.  
801 <https://doi.org/10.4049/jimmunol.169.5.2507>
- 802 Smith, A., Howell, D., Patmore, R., Jack, A., Roman, E., 2011. Incidence of  
803 haematological malignancy by sub-type: a report from the Haematological  
804 Malignancy Research Network. *British Journal of Cancer* 105, 1684–1692.  
805 <https://doi.org/10.1038/bjc.2011.450>
- 806 Sobocinski, G.P., Toy, K., Bobrowski, W.F., Shaw, S., Anderson, A.O., Kaldjian, E.P.,  
807 2010. Ultrastructural localization of extracellular matrix proteins of the lymph node  
808 cortex: evidence supporting the reticular network as a pathway for lymphocyte  
809 migration. *BMC Immunol* 11, 42. <https://doi.org/10.1186/1471-2172-11-42>
- 810 Sutherland, R.M., 1988. Cell and environment interactions in tumor microregions: the  
811 multicell spheroid model. *Science* 240, 177–184.  
812 <https://doi.org/10.1126/science.2451290>

- 813 Tancred, T.M., Belch, A.R., Reiman, T., Pilarski, L.M., Kirshner, J., 2009. Altered  
814 Expression of Fibronectin and Collagens I and IV in Multiple Myeloma and  
815 Monoclonal Gammopathy of Undetermined Significance. *J Histochem Cytochem*  
816 57, 239–247. <https://doi.org/10.1369/jhc.2008.952200>
- 817 Tellier, J., Menard, C., Roulland, S., Martin, N., Monvoisin, C., Chasson, L., Nadel,  
818 B., Gaulard, P., Schiff, C., Tarte, K., 2014. Human t(14;18)positive germinal center  
819 B cells: a new step in follicular lymphoma pathogenesis? *Blood* 123, 3462–3465.  
820 <https://doi.org/10.1182/blood-2013-12-545954>
- 821 Teras, L.R., DeSantis, C.E., Cerhan, J.R., Morton, L.M., Jemal, A., Flowers, C.R.,  
822 2016. 2016 US lymphoid malignancy statistics by World Health Organization  
823 subtypes. *CA: A Cancer Journal for Clinicians* 66, 443–459.  
824 <https://doi.org/10.3322/caac.21357>
- 825 Tian, Y.F., Ahn, H., Schneider, R.S., Yang, S.N., Roman-Gonzalez, L., Melnick, A.M.,  
826 Cerchietti, L., Singh, A., 2015. Integrin-specific hydrogels as adaptable tumor  
827 organoids for malignant B and T cells. *Biomaterials* 73, 110–119.  
828 <https://doi.org/10.1016/j.biomaterials.2015.09.007>
- 829 Trushko, A., Di Meglio, I., Merzouki, A., Blanch-Mercader, C., Abuhattum, S., Guck,  
830 J., Alessandri, K., Nassoy, P., Kruse, K., Chopard, B., Roux, A., 2020. Buckling of  
831 an Epithelium Growing under Spherical Confinement. *Developmental Cell* 54, 655-  
832 668.e6. <https://doi.org/10.1016/j.devcel.2020.07.019>
- 833 Verdière, L., Mourcin, F., Tarte, K., 2018. Microenvironment signaling driving  
834 lymphomagenesis. *Current Opinion in Hematology* 25, 335.  
835 <https://doi.org/10.1097/MOH.0000000000000440>

836 Wu, C., Lu, Y., 2007. Inclusion of high molecular weight dextran in calcium  
837 phosphate-mediated transfection significantly improves gene transfer efficiency.  
838 Cell Mol Biol (Noisy-le-grand) 53, 67–74.

839 Zhang, Jun, Seet, C.S., Sun, C., Li, J., You, D., Volk, A., Breslin, P., Li, X., Wei, W.,  
840 Qian, Z., Zeleznik-Le, N.J., Zhang, Z., Zhang, Jiwang, 2013. p27kip1 maintains a  
841 subset of leukemia stem cells in the quiescent state in murine MLL-leukemia. Mol  
842 Oncol 7, 1069–1082. <https://doi.org/10.1016/j.molonc.2013.07.011>

843 Zinkel, S., Gross, A., Yang, E., 2006. BCL2 family in DNA damage and cell cycle  
844 control. Cell Death Differ. 13, 1351–1359. <https://doi.org/10.1038/sj.cdd.4401987>

845

846 **FIGURE LEGENDS**

847 **Figure 1: B NHL spheroids obtained by using the cellular capsule technology.**

848 **A:** Representative images of cell growth in alginate capsule shells over time for the  
849 various cell lines. Scale bar: 100 $\mu$ m. **B:** Percentage of SU-DHL-4 and HLY1 cell  
850 death measured after shell dissolution and cell dissociation at various culture time  
851 points. To evaluate the cell death propidium iodide (PI) (10 $\mu$ g/mL) was added to the  
852 cell suspension and PI fluorescence was analyzed by flow cytometry (n=3). **C:**  
853 Immunostaining showing the repartition of proliferating and apoptotic cells in SU-  
854 DHL-4 and HLY1-derived spheroids at day 8 or 12 post-encapsulation. Five  
855 micrometers thick sections were stained with anti-Ki67 (Ki67, in green), and anti-  
856 cleaved caspase 3 (CC3, in red), to identify proliferating and dead cells, respectively.  
857 Nuclei are depicted in blue. Scale bar: 100 $\mu$ m.

858

859 **Figure 2: B NHL spheroids are cohesive and express extracellular matrix.**

860 **A:** Pictures showing the maintenance of SU-DHL-4 spheroids after the capsule  
861 dissolution by incubation in PBS containing 1 mM EGTA. Scale bar: 100 $\mu$ m. **B:**  
862 Immunostaining showing the expression of extracellular matrix in cells cultured in  
863 suspension (2D) or in spheroids (3D). After fixation, cell suspension was centrifuged  
864 and pellet was embedded in 2% agarose and then in paraffin, as performed for  
865 spheroids. Extracellular matrix components were visualized by staining with anti-pan  
866 laminin, anti- fibronectin and anti- collagen I antibodies on 5 $\mu$ m thick sections. Nuclei  
867 are depicted in blue. Scale bar: 50 $\mu$ m.

868

869 **Figure 3: The establishment of a stromal network is necessary to reproduce**  
870 **stromal-dependent B NHL cell growth.**

871 **A:** Effect of Matrigel (Mg) and TSC on spheroid growth. Left panel, representative  
872 images of spheroids obtained from B cells encapsulated with or without Mg and TSC  
873 at D7 (HLY1), D6 (SU-DHL-4) or D10 (DOHH2) of culture. Scale bar: 200 $\mu$ m. Right  
874 panel, the cell number was evaluated at various culture time points in the different  
875 conditions (n=3). **B:** TSC network needs Mg to be established. *Left*, example of TSC  
876 encapsulated without Mg. *Right*, example of TSC encapsulated with Mg. TSC were  
877 visualized in green by stable expression of GFP and nuclei were stained in blue with  
878 Hoechst 33252. Capsules were imaged 3 days after encapsulation. Images were  
879 maximum intensity projection from z-stacks. Scale bar: 100 $\mu$ m. **C:** TSC network is  
880 necessary to induce DOHH2 spheroid growth. DOHH2 were co-encapsulated with  
881 TSC with or without Mg for 10 days. TSC were visualized in green by stable  
882 expression of GFP. **D:** TSC/Mg interaction. TSC were encapsulated in the presence  
883 of Mg. After 3 days in culture, capsules were fixed and immunofluorescence was  
884 performed. Mg and TSC were visualized by staining with anti-human pan laminin (in  
885 red) and anti-GFP (in green), respectively. Nuclei were counterstained in blue with  
886 Hoechst 33258. Images were maximum intensity projection from z-stacks. Scale bar:  
887 50 $\mu$ m. Yellow square is a crop showing the hanging of TSC on Mg coating. Scale  
888 bar: 10 $\mu$ m.

889

#### 890 **Figure 4: Self-organization of the stromal network.**

891 **A:** Representatives images of capsules containing DOHH2 with Mg and TSC at  
892 different culture time point. After fixation, 10 to 18 spheroids for each time point were  
893 placed in an Universlide (Alessandri et al 2017). Images shown are Z-projection. TSC  
894 are shown in green and all the analyses were performed on green signal exclusively.  
895 Scale bar: 50 $\mu$ m **(B)** and **(C)** Sphericity and branchness indexes of green particles

896 contained in spheroids at different time after encapsulation, respectively. To  
897 determine significant differences, Anova was performed (\* $P < 0.05$ , \*\* $P < 0.01$ ,  
898 \*\*\* $P < 0.001$ , \*\*\*\* $P < 0.0001$ ). (D) Correlation of sphericity and branchness. For each  
899 time point, small dots represent individual spheroids whereas big dots represent the  
900 average values of all spheroids. Pearson correlation coefficient (R) was calculated  
901 using R software. The black line represents the regression line and the grey area  
902 represents the 95% confidence interval of the linear regression.

903

904 **Figure 5: Spheroids recapitulate the FL stromal cell phenotype.**

905 **A:** Tonsil B cells (revealed with anti-PAX5 antibody in blue) interact mainly with  
906 stromal cells expressing podoplanin (red). In FL lymph node, tumor B cells interact  
907 with stromal cells expressing podoplanin (red) and transglutaminase (green) markers.  
908 Scale bar: 250 $\mu$ m. In the 3D model TSCs adopt a particular phenotype in contact  
909 with DOHH2 by expressing transglutaminase (in green) and podoplanin (in red)  
910 markers. Scale bar: 100 $\mu$ m. **B:** 3D model at a higher magnification represents  
911 DOHH2 (in blue) in close contact with the podoplanin (shown by arrows in red) and  
912 transglutaminase (in green) expressing TSC network. Scale bars: 50 $\mu$ m. All images  
913 were stained with multiplex immunofluorescence microscopy method and visualized  
914 by Nanozoomer software.

915

916 **Figure 6: Comparison of DOHH2 and FL B cell gene transcriptional expression**  
917 **profile.**

918 **A:** Heatmap of DOHH2 gene expression levels evaluated by Real Time quantitative  
919 PCR (RT-qPCR) in cells cultured in 2D without (n=5) or with TSC (n=3), and in 3D  
920 with TSC (n=5). Analysis of DOHH2 transcriptional gene expression profiles, by RT-



921 qPCR, for **B**: *CDKN1A* and *CDKN1B*, **C**: *BCL2*, **D**: *EGLN1* and *VEGFA*, **F**: *RGS13*  
922 and *CXCR4*, **G**: *RELB*, *TNFAIP3*, *BCL2A1* and *CFLAR*. DOHH2 were cultured in 2D  
923 without (n=5) or with TSC (n=3) and in 3D with TSC (n=5) for 10 days. Variation gene  
924 expression study between tonsil centrocytes (n=6) and FL lymph nodes tumoral B  
925 cells (n=10) was studied by using Affymetrics micro-array analysis. A Kruskal Wallis  
926 test was performed for *in vitro* experiments and a two tailed Mann Whitney test was  
927 performed for the variation gene expression study between tonsil centrocytes (CC)  
928 and LF lymph nodes tumoral B cells (FL C). ( $p < 0.05^*$ ,  $p < 0.01^{**}$ ). Bar represent the  
929 geometric mean of independent experiments.

930

### 931 **Figure 7: Impact of 3D culture on drug response in B-NHL.**

932 **A-C**: Comparison of cell death induced by doxorubicin in SU-DHL-4 (**A**), HLY1 (**B**)  
933 and DOHH2 (**C**) cultured in 2D or in 3D alone (*left panel*) or with TSC (2D+TSC or  
934 3D+TSC) (*right panel*). For 2D culture, B cells were seeded alone or in presence of  
935 TSC . For 3D culture, 100 confluent capsules, containing B cells alone or B cells with  
936 TSC in presence of Matrigel, were seeded. 2D and 3D cultures were exposed to  
937 doxorubicin at a concentration corresponding to its EC50 and cell death was  
938 evaluated after 24h.. **D**: Comparison of cell death induced by ABT-199 (1 $\mu$ M) in  
939 DOHH2 cells cultured in 2D (*left panel*) or in 3D with TSC and Matrigel (*right panel*),  
940 for 24h. The data represent mean  $\pm$  SE of, at least, three independent experiments  
941 (Wilcoxon test.  $*P < 0.05$ ,  $**P < 0.01$ ,  $***P < 0.001$ ,  $****P < 0.0001$ ).

942

943 **Movie 1: Dissolution of alginate shell.** Alginate shell of capsule containing SU-  
944 DHL-4 spheroid obtained after 10 days in culture is dissolved in a bath of PBS/EGTA.  
945 The images were acquired every 15 seconds until complete dissolution of capsule  
946 using an epifluorescence microscope (Leica DMI8).

947

948 **Movie 2: Establishment of the stromal cell network.** TSC expressing GFP and  
949 DOHH2 expressing dTomato were co-encapsulated in presence of Matrigel and  
950 placed in an Universlide in DMEM containing 10% FCS. The images were acquired  
951 immediately after encapsulation every 30 minutes for 12 hours using an  
952 epifluorescence microscope (Leica DMI8) equipped with a thermostatic and CO2  
953 chamber (Live on Stage, Leica). Scale bar: 100µm.

954

955 **Movie 3: Spatial organization of lymphoma spheroid.** 3D reconstruction from  
956 optical sections using confocal microscopy of capsule containing DOHH2 with Mg  
957 and TSC cultured for 6 days.

958

| <b>Pathway</b>                           | <b>Gene</b>                                                                                                  |
|------------------------------------------|--------------------------------------------------------------------------------------------------------------|
| <b>Cell survival</b>                     | <i>CFLAR</i><br><i>BCL2</i><br><i>BRCA1</i><br><i>BCL2A1</i>                                                 |
| <b>Hypoxia</b>                           | <i>VEGFA</i><br><i>EGLN1</i>                                                                                 |
| <b>B cell and BCR activation</b>         | <i>EBI3</i><br><i>FYN</i><br><i>CD79b</i><br><i>CD79a</i><br><i>RRM2</i>                                     |
| <b>Proliferation and differentiation</b> | <i>CD24</i><br><i>MET</i><br><i>CD72</i>                                                                     |
| <b>Cell cycle</b>                        | <i>CDC20</i><br><i>CDK1</i><br><i>CDK4</i>                                                                   |
| <b>Mechanosensitive</b>                  | <i>PIEZO 1</i>                                                                                               |
| <b>NFκB</b>                              | <i>TNFAIP3</i><br><i>BCL10</i><br><i>RELB</i>                                                                |
| <b>Quiescence</b>                        | <i>CDKN1B</i><br><i>CDKN1A</i>                                                                               |
| <b>Confinement and motility</b>          | <i>CXCR4</i><br><i>RGS13</i><br><i>P2RY8</i><br><i>S1PR1</i><br><i>CCR7</i><br><i>GPR183</i><br><i>CXCR5</i> |
| <b>Apoptosis</b>                         | <i>CASP8</i>                                                                                                 |
| <b>Cell and matrix interactions</b>      | <i>ADAM8</i>                                                                                                 |
| <b>Adhesion</b>                          | <i>CD52</i>                                                                                                  |
| <b>Others</b>                            | <i>RGS10</i><br><i>KLF4</i><br><i>LMO2</i><br><i>IL6R</i>                                                    |
| <b>Housekeeping genes</b>                | <i>GAPDH</i><br><i>ABL1</i>                                                                                  |

959 **Table 1: List of genes studied by RT-qPCR arrays.**

960

Figure 1

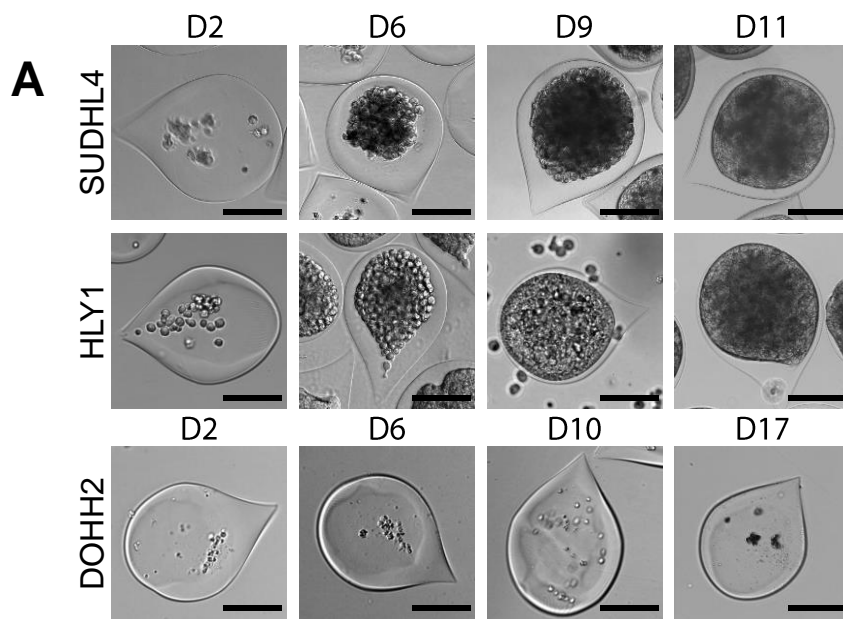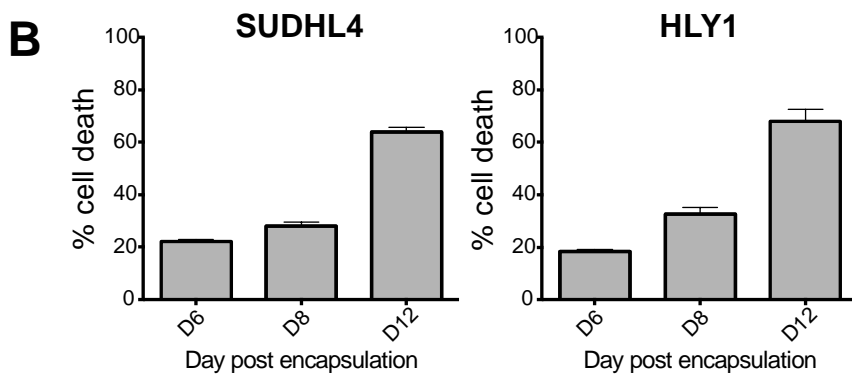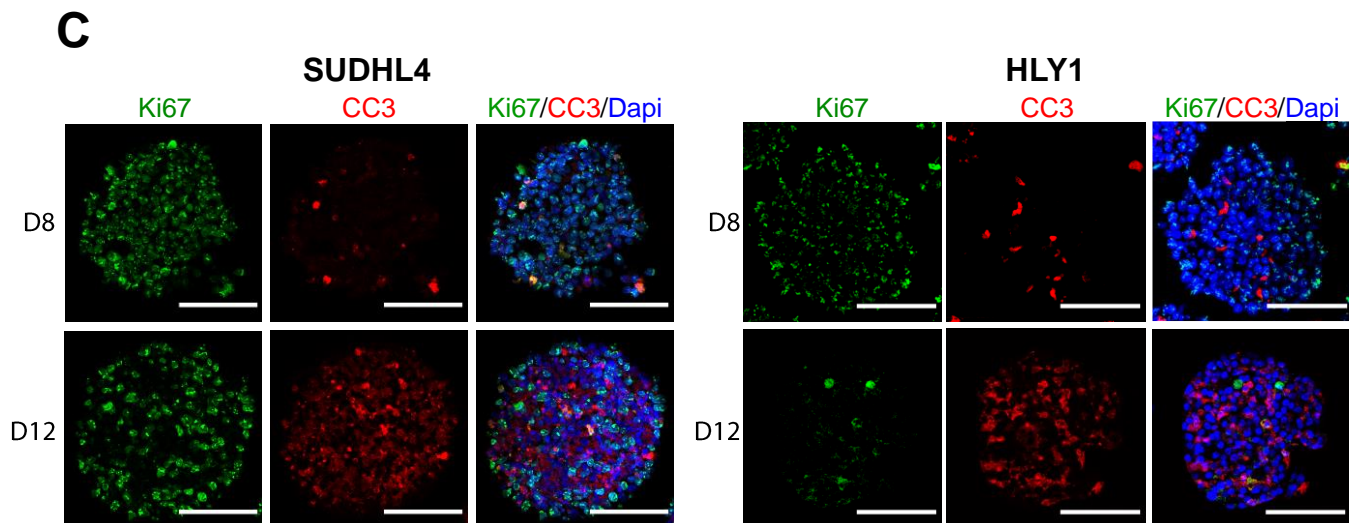

Figure 2

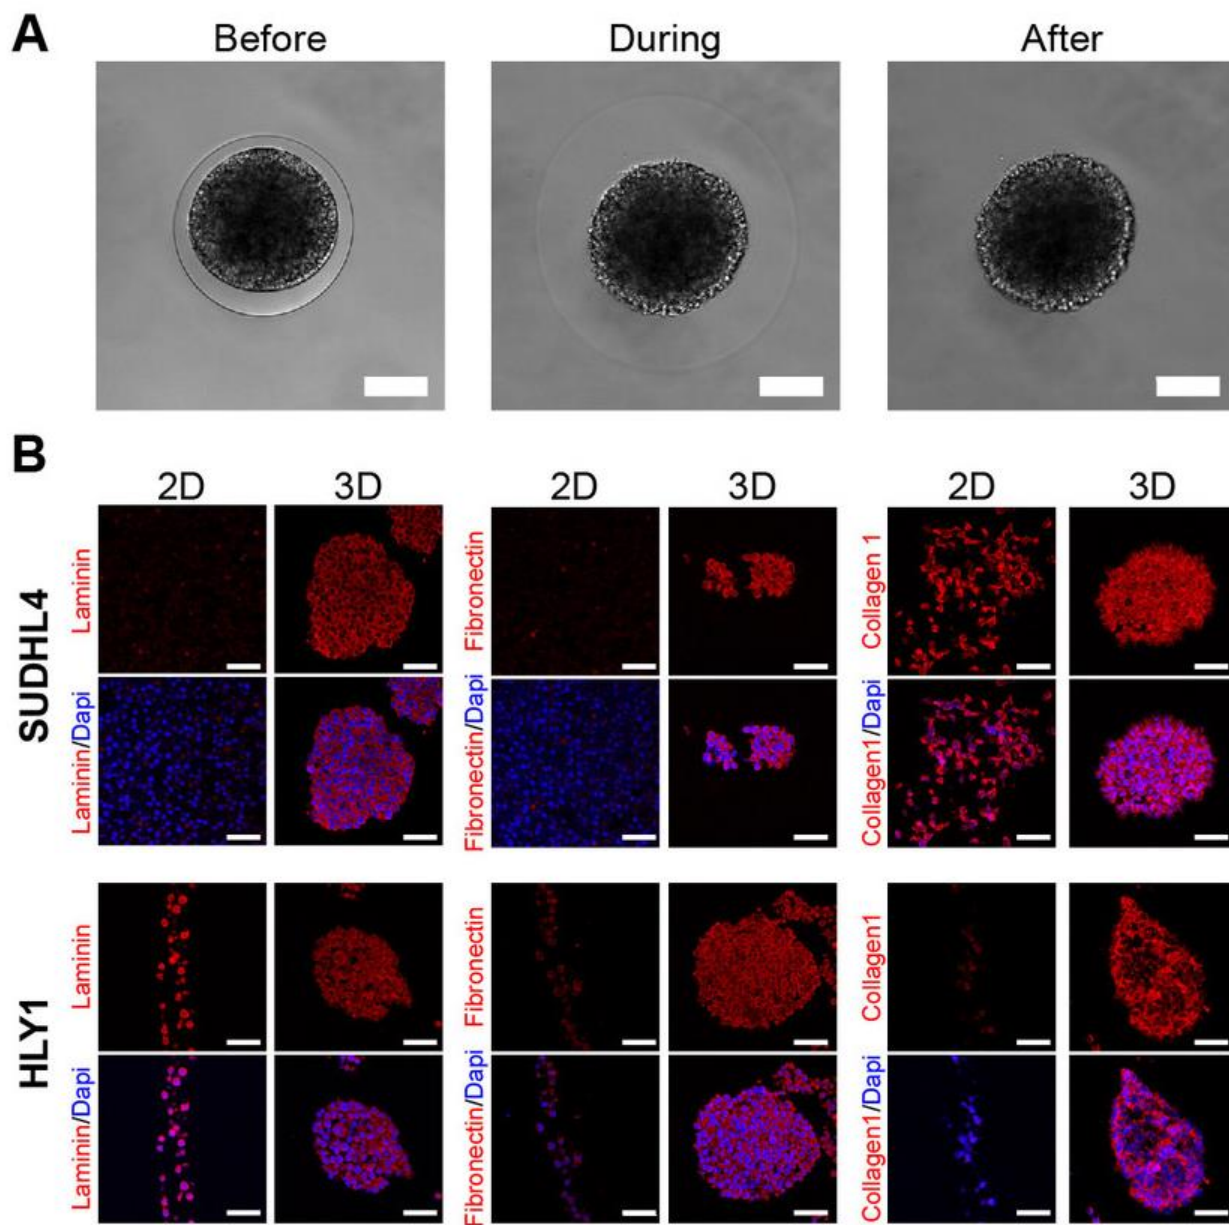

Figure 3

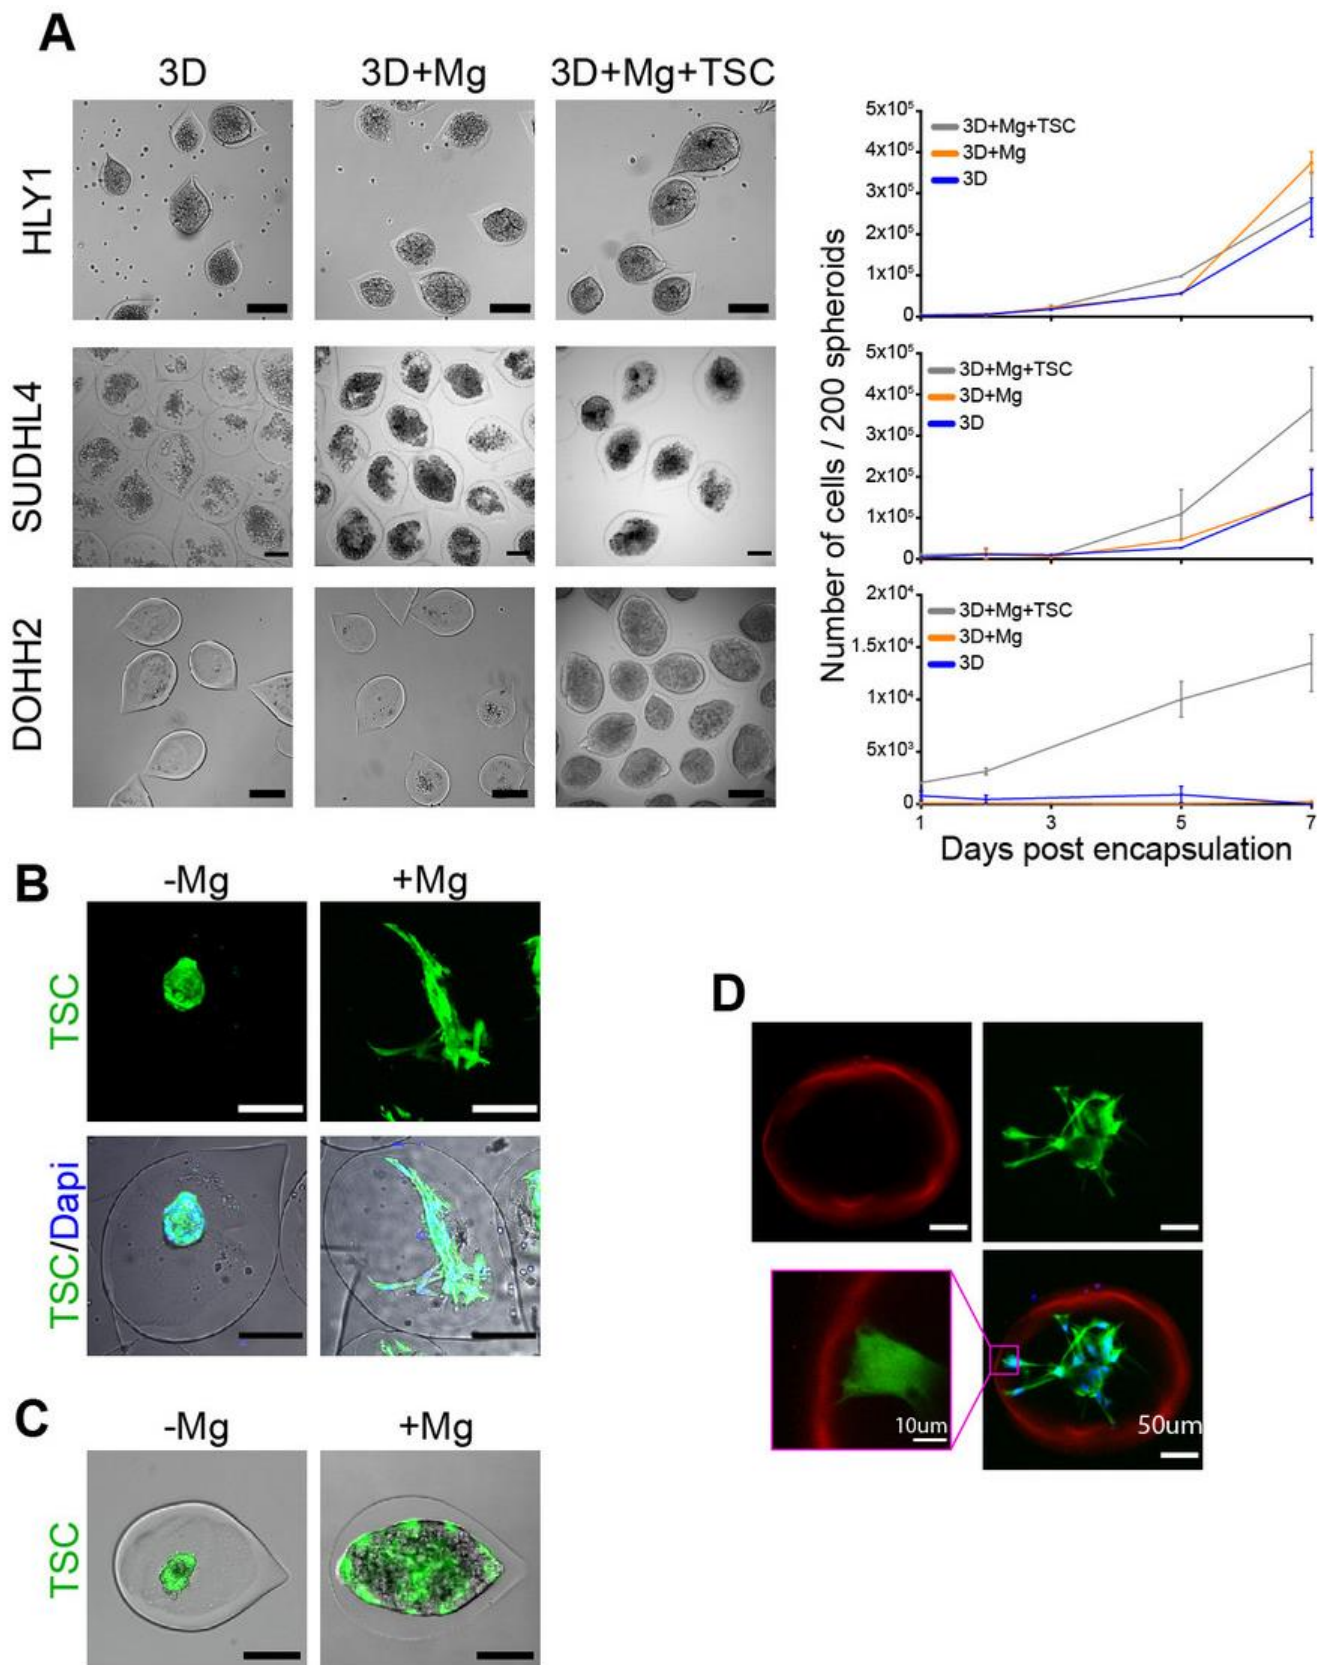



Figure 4

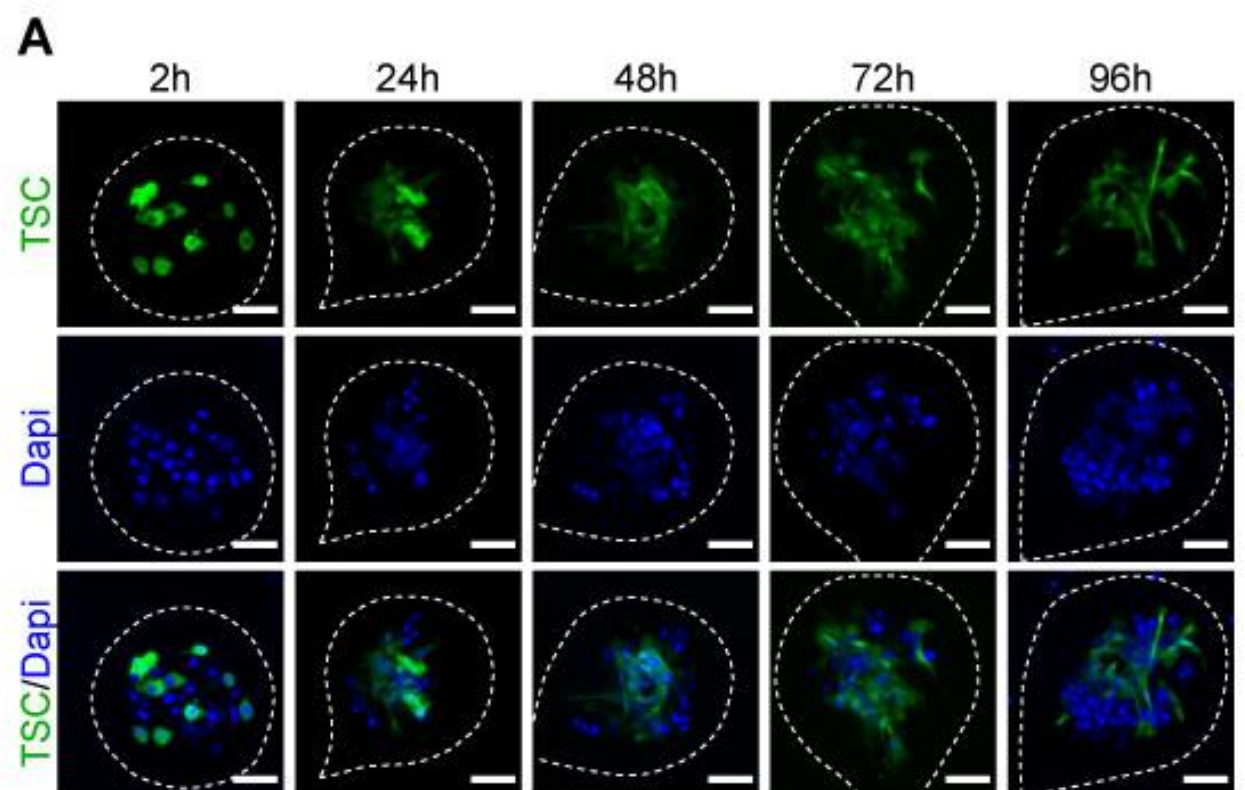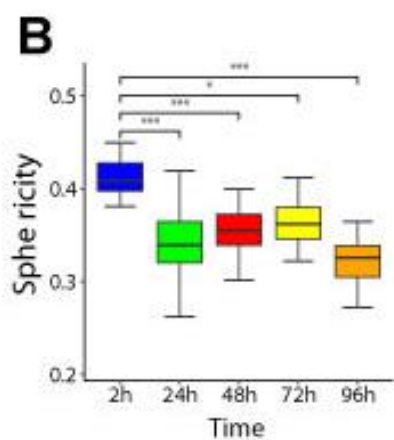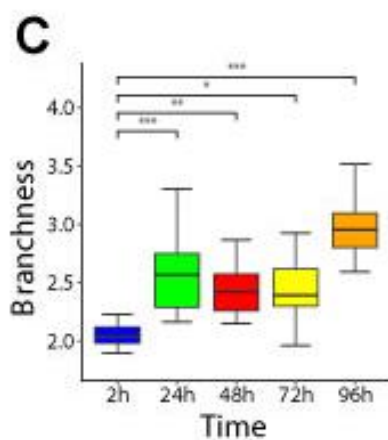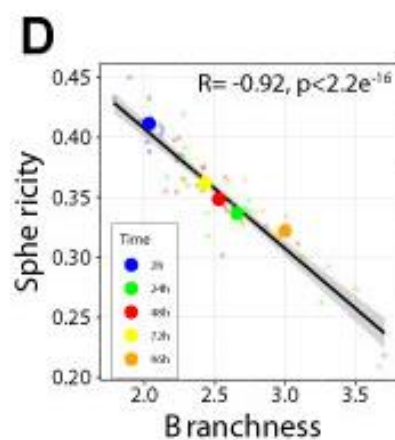

# Figure 5

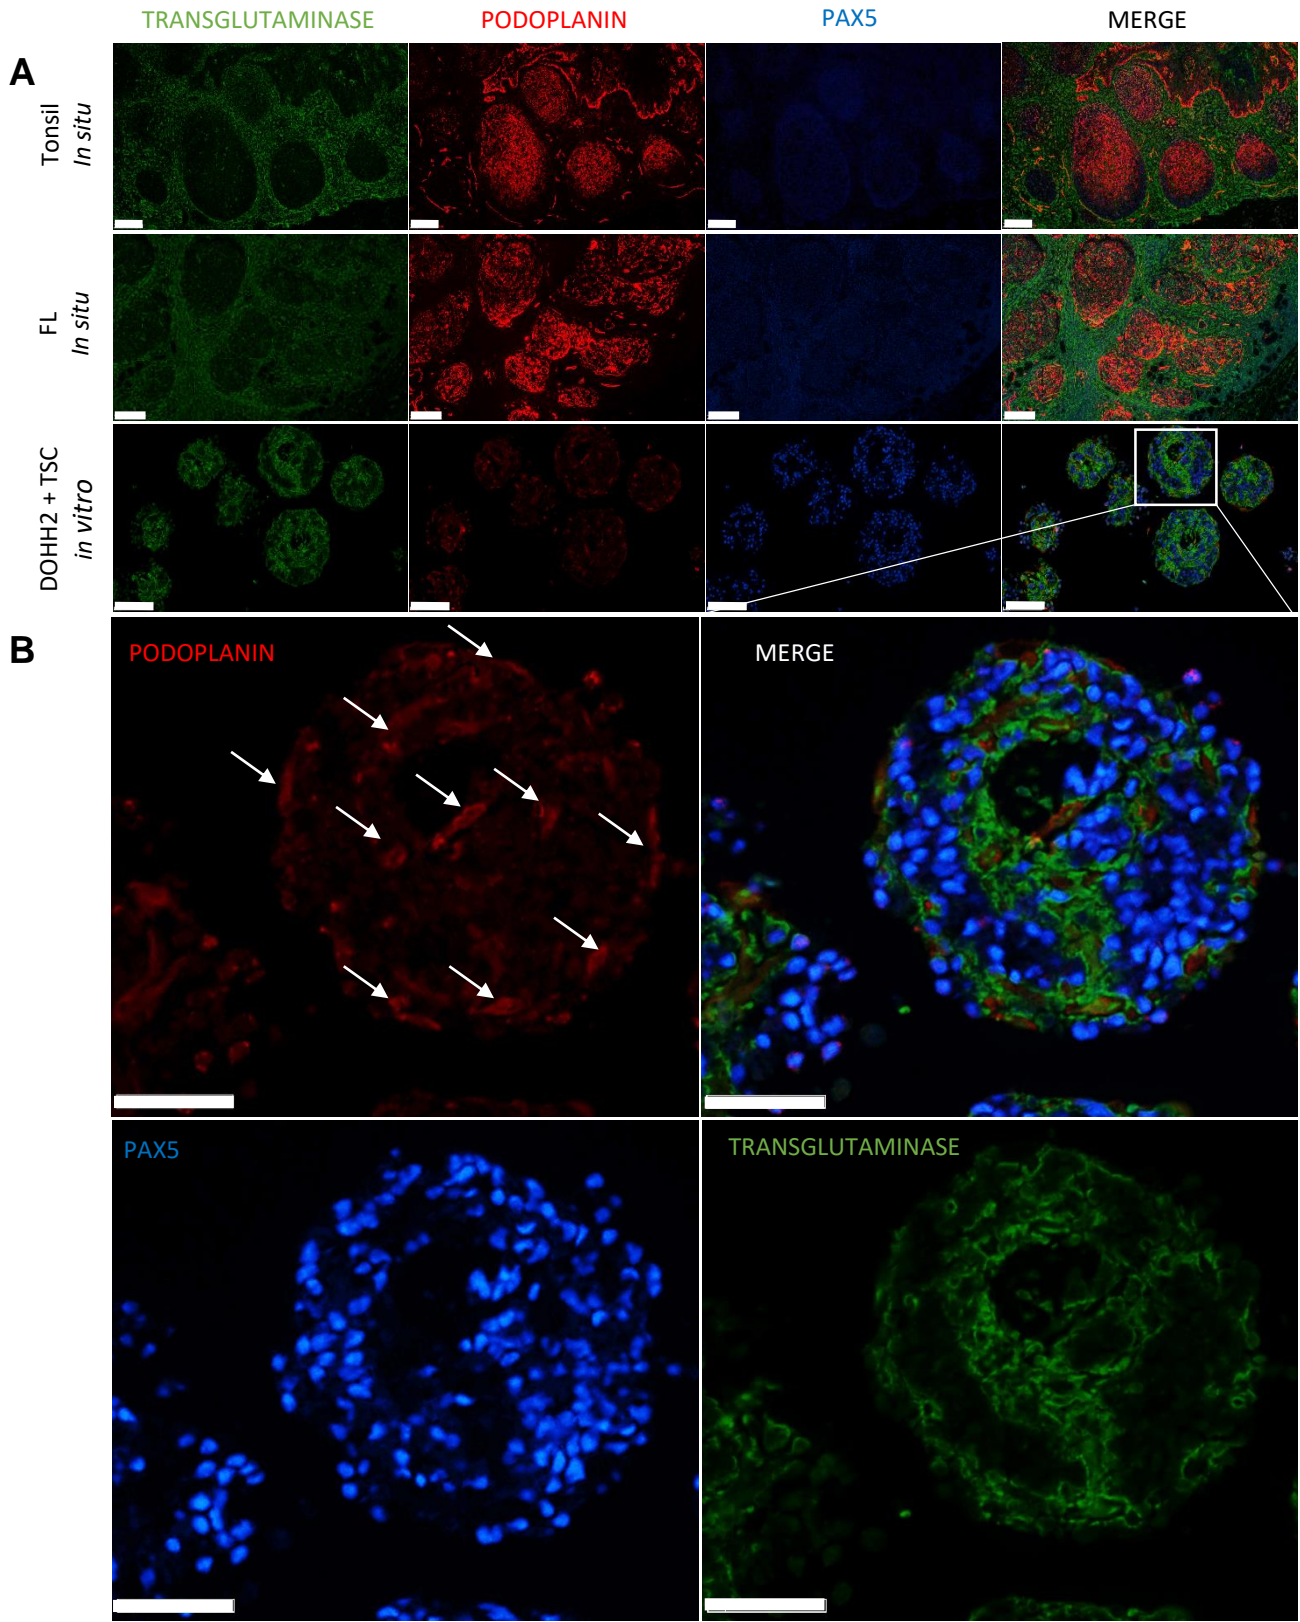



Figure 6

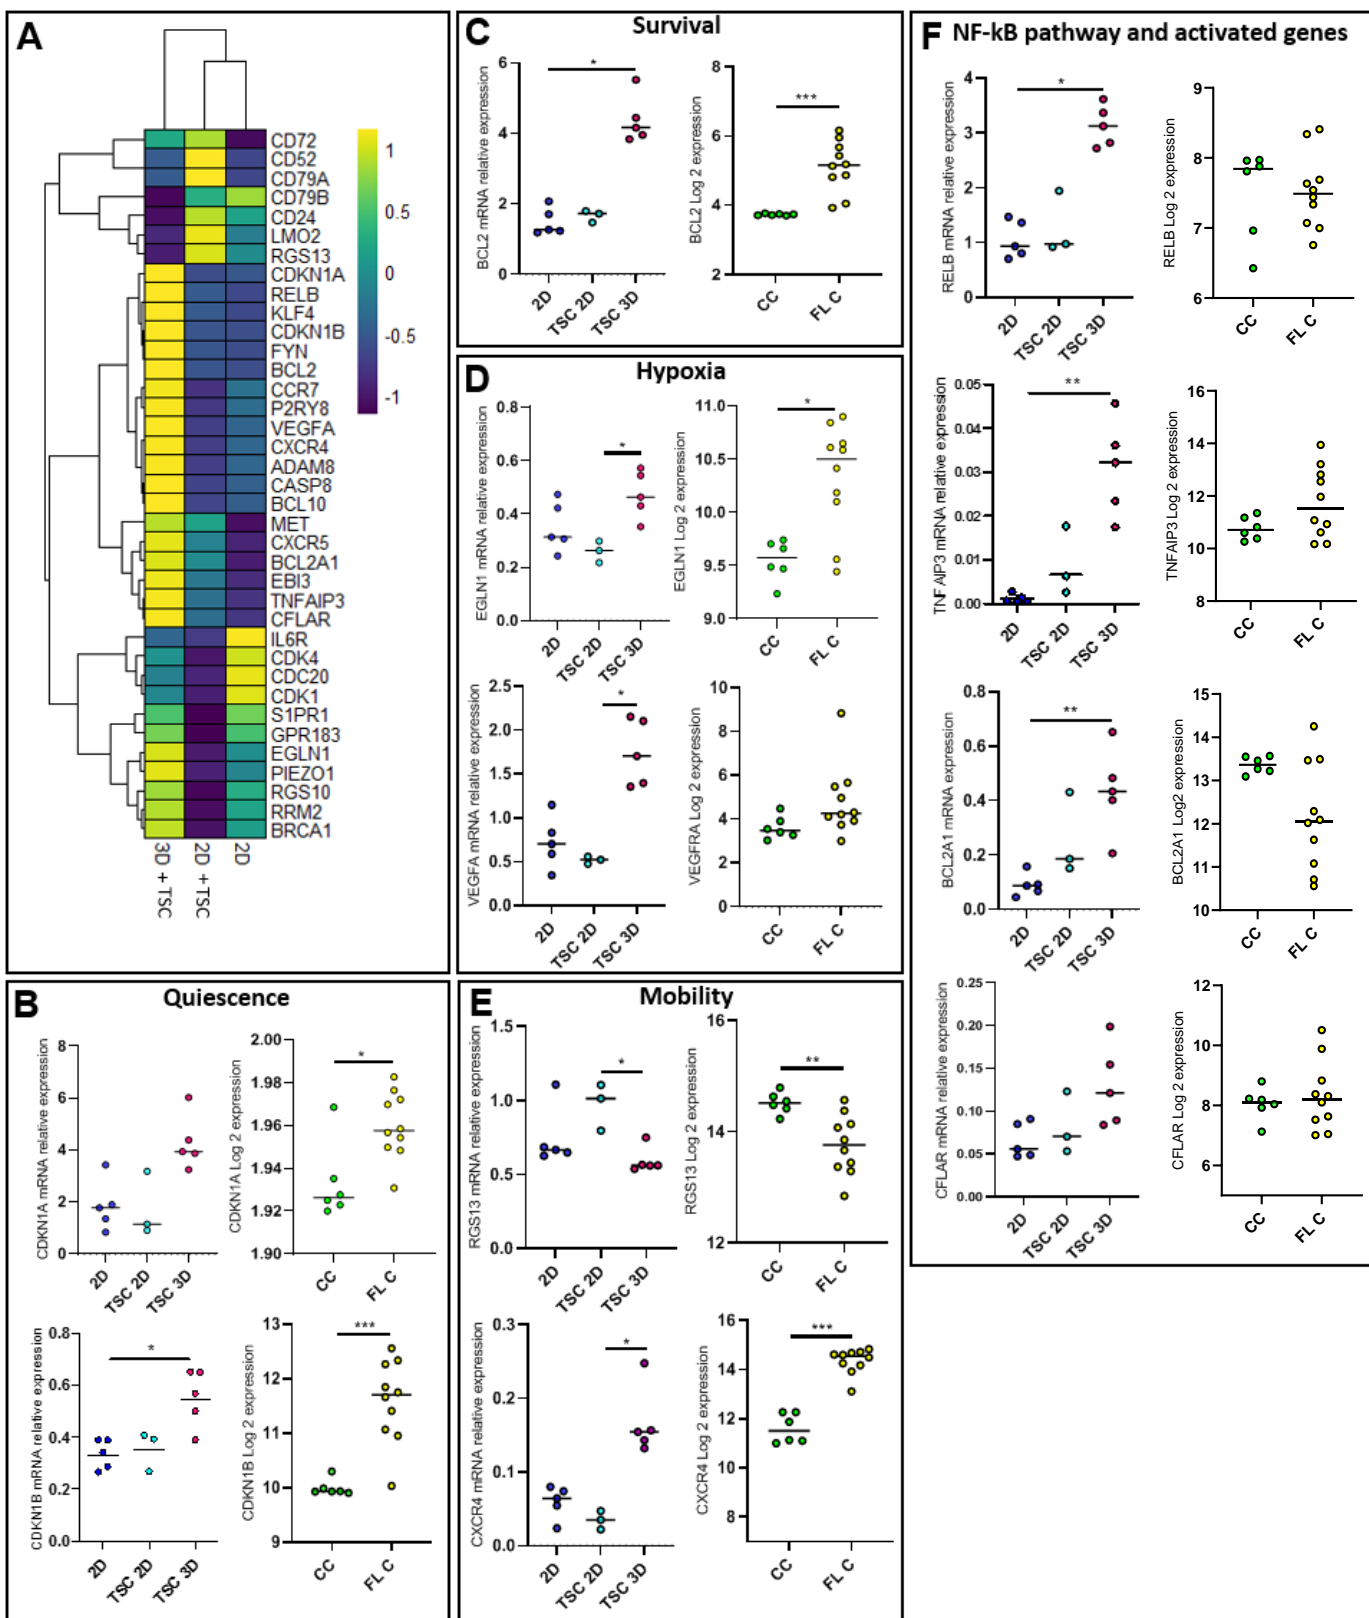

Figure 7

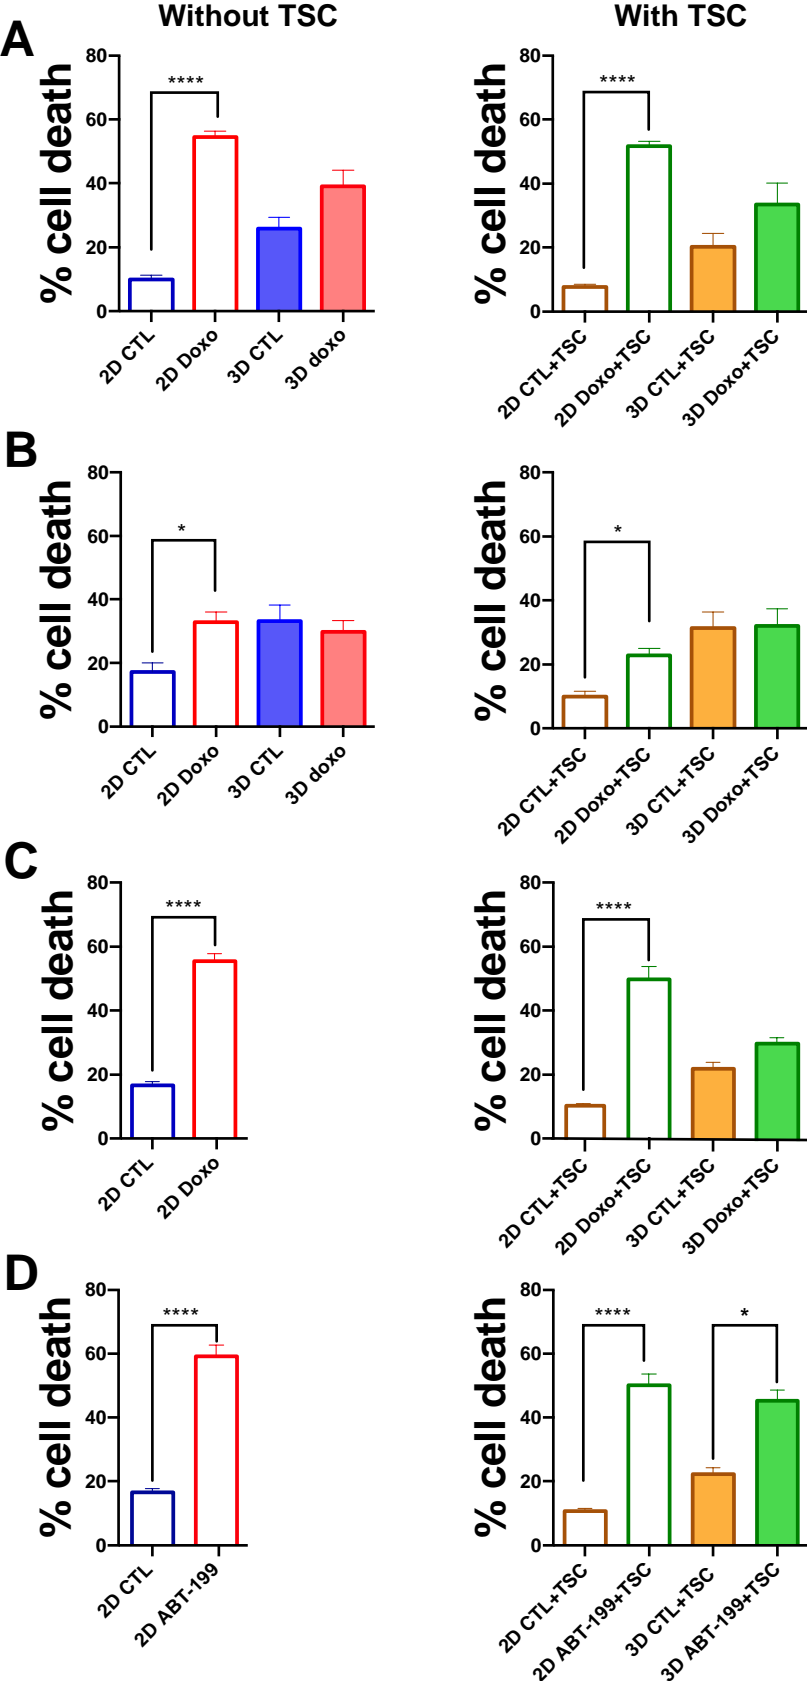

Source: https://www.biorxiv.org/content/10.1101/2020.10.17.343657v1.full.pdf
